# Supplementary material for: Transcriptional Profiling Reveals Brain Region-Specific Gene Networks Regulated in Exercise in a Mouse Model of Parkinson’s Disease
Source: Front Aging Neurosci. 2022 Jun 23;14:891644. doi: 10.3389/fnagi.2022.891644 (PMC9260255; doi:10.3389/fnagi.2022.891644)
Supplement: Supplementary file 2 [file Table_2.XLSX]

## Sheet: TableS2_SN_motifEnrichmentTable
Table S2. motif Enrichment in SN
	geneSet	motif	NES	AUC	TF_highConf	TF_lowConf	nEnrGenes	rankAtMax	enrichedGenes
1	exercise	transfac_pro__M01391	3.95	0.0592	Pax6 (directAnnotation).	Alx1; Lhx4; Prrx2; Sebox; Uncx (inferredBy_MotifSimilarity). Emx1; Emx2; Lhx2; Lhx3; Lhx6; Lhx8; Lhx9; Otp; Pou6f1; Vsx2; Zfhx2 (inferredBy_MotifSimilarity_n_Orthology).	16	417	Atoh7;Baiap2l2;Bves;Chat;Cyp26a1;Eomes;Fezf2;Foxg1;Hkdc1;Lbx1;Neurod1;Neurod2;Onecut1;Slc18a3;Slc6a5;Tbr1
2	exercise	cisbp__M1244	3.72	0.0569			23	819	Actg2;Agtr1a;Baiap2l2;Bcl2a1d;Blk;Egr2;Egr3;Eomes;Fezf2;Kcng3;Kcnmb1;Lbx1;Lhx6;Lox;Neurod2;Neurod6;Npy;Rtn4rl2;Slc14a2;Slc6a5;Spag16;Tbr1;Vgll3
3	exercise	transfac_pro__M01360	3.71	0.0569	Dbx2 (directAnnotation).	Hoxb4; Msx1; Pou3f2; Pou3f4 (inferredBy_MotifSimilarity). Hoxa1; Hoxb1; Hoxd1; Nkx6-1; Nkx6-2; Nkx6-3 (inferredBy_MotifSimilarity_n_Orthology).	14	316	Baiap2l2;Chat;Cyp26a1;Fezf2;Foxg1;Fst;Lbx1;Neurod1;Neurod2;Onecut1;Rab44;Slc18a3;Slc6a5;Wdr69
4	exercise	transfac_pro__M01477	3.65	0.0562	Pou3f2 (directAnnotation).	Alx1; Alx3; Alx4; Dbx2; Hoxa4; Hoxb4; Hoxc5; Lhx2; Lhx3; Lhx5; Lmx1b; Nkx6-3; Nobox; Pou1f1; Pou2f1; Pou3f4; Prrx2; Sebox; Shox2 (inferredBy_MotifSimilarity). Lhx1; Lhx4; Lhx6; Lhx8; Lhx9; Noto; Otp; Pou6f1; Prop1; Prrxl1; Uncx (inferredBy_MotifSimilarity_n_Orthology).	17	534	Atoh7;Baiap2l2;Chat;Eomes;Fezf2;Foxg1;Krt20;Lbx1;Neurod1;Neurod2;Onecut1;Rab44;Slc14a2;Slc18a3;Slc6a5;Tbr1;Xirp2
5	exercise	hocomoco__ZNF18_HUMAN.H11MO.0.C	3.58	0.0555	Zkscan6 (inferredBy_Orthology).		8	63	9130024F11Rik;Cd5;F7;Fst;Kcng3;Mfi2;Rtn4rl2;Satb2
6	exercise	cisbp__M1225	3.57	0.0555		Vsx1 (inferredBy_MotifSimilarity).	14	277	Baiap2l2;Cyp26a1;Egr3;Fezf2;Foxg1;Fst;Lbx1;Neurod2;Nr4a3;Oit3;Onecut1;Pkp3;Slc6a5;Tbr1
7	exercise	transfac_pro__M07812	3.54	0.0552	Uncx (inferredBy_Orthology).	Arx; Gbx1; Lhx3; Rax; Shox2; Vsx1 (inferredBy_MotifSimilarity). Alx3; En1; En2; Esx1; Gbx2; Hesx1; Isl1; Isl2; Isx; Lbx1; Lbx2; Lhx4; Lhx6; Lhx8; Lhx9; Mixl1; Msx1; Msx2; Noto; Prrx1; Prrx2; Tlx2; Vax1; Vsx2; Zbtb49 (inferredBy_MotifSimilarity_n_Orthology).	14	310	Baiap2l2;Cyp26a1;Egr3;Eomes;Fezf2;Lbx1;Lhx6;Neurod1;Neurod2;Onecut1;Pkp3;Rnf39;Slc6a5;Tbr1
8	exercise	taipale_cyt_meth__ALX4_CYAATTAN_eDBD_meth	3.52	0.055	Alx4 (inferredBy_Orthology).	Barx2; En1; Hoxa1; Hoxa5; Hoxb5; Lhx3; Lhx4; Prrx2; Vsx1 (inferredBy_MotifSimilarity). Alx3; Arx; Emx1; En2; Esx1; Lhx6; Lhx8; Lmx1b; Msx2; Nkx1-1; Nkx1-2; Phox2a; Prrx1; Uncx; Vax1; Vax2 (inferredBy_MotifSimilarity_n_Orthology).	15	395	Baiap2l2;Cyp26a1;Egr3;Eomes;Fezf2;Lbx1;Lhx6;Neurod1;Neurod2;Onecut1;Pkp3;Rnf39;Slc6a5;Tac2;Tbr1
9	exercise	homer__ADBTAATTAR_Lhx3	3.47	0.0545	Lhx3 (directAnnotation).	Alx1; Alx3; Barx2; En1; Esx1; Evx1; Hoxa3; Hoxd1; Lhx1; Lhx2; Lhx4; Lhx5; Lhx8; Lmx1a; Msx1; Pax4; Pou3f2; Prrx1; Prrx2; Shox2; Uncx; Vsx1 (inferredBy_MotifSimilarity). Alx4; Arx; Emx1; Emx2; En2; Gbx1; Gbx2; Gsx2; Hoxb3; Isx; Lbx1; Lhx6; Lhx9; Lmx1b; Mixl1; Noto; Otp; Tlx2; Vax1; Vax2 (inferredBy_MotifSimilarity_n_Orthology).	13	250	Atoh7;Egr3;Eomes;Fezf2;Lbx1;Neurod1;Neurod2;Onecut1;Pkp3;Rnf39;Slc6a5;Tac2;Tbr1
10	exercise	transfac_pro__M07819	3.46	0.0543		Alx1; Alx4; Arx; Emx2; En1; Gbx1; Gbx2; Lhx8; Msx1; Msx3; Nkx1-2; Prrx2; Rax; Shox2; Uncx; Vax2; Vsx1 (inferredBy_MotifSimilarity). Alx3; Dlx1; Dlx4; Dlx6; Emx1; En2; Esx1; Hesx1; Hoxa6; Hoxa7; Hoxb6; Hoxb7; Hoxc6; Isx; Lbx1; Lbx2; Lhx4; Lhx6; Lhx9; Mixl1; Mnx1; Msx2; Noto; Prrx1; Tlx2; Vax1; Vsx2; Zbtb49 (inferredBy_MotifSimilarity_n_Orthology).	14	310	Baiap2l2;Cyp26a1;Egr3;Eomes;Fezf2;Lbx1;Lhx6;Neurod1;Neurod2;Onecut1;Pkp3;Rnf39;Slc6a5;Tbr1
11	exercise	taipale_cyt_meth__PHOX2A_CYAATTAN_eDBD_meth	3.45	0.0543	Phox2a (inferredBy_Orthology).	En1; Lhx4; Prrx2 (inferredBy_MotifSimilarity). Alx3; Alx4; Arx; Emx1; Hoxd1; Lhx3; Lhx6; Lhx8; Nkx1-1; Nkx1-2; Prrxl1; Vax1; Vax2; Vsx1 (inferredBy_MotifSimilarity_n_Orthology).	15	403	Baiap2l2;Cyp26a1;Egr3;Eomes;Fezf2;Lbx1;Lhx6;Neurod1;Neurod2;Onecut1;Pkp3;Rnf39;Slc6a5;Tac2;Tbr1
12	exercise	cisbp__M1622	3.44	0.0541		Eomes; Tbr1; Tbx15; Tbx2; Tbx20; Tbx3; Tbx4; Tbx5 (inferredBy_MotifSimilarity). Mga; T; Tbx1; Tbx10; Tbx18; Tbx19; Tbx21; Tbx6 (inferredBy_MotifSimilarity_n_Orthology).	17	563	9130024F11Rik;Actg2;F7;Fst;Kcnj4;Lox;Mesp2;Mfi2;Neurod1;Neurod2;Nkg7;Nr4a3;Rtn4rl2;Satb2;Tbr1;Tcp11;Zfp831
13	exercise	bergman__retn	3.42	0.0539	Arid3c (inferredBy_Orthology).		28	1127	Atoh7;Baiap2l2;Bcl2a1d;Chat;Cyp26a1;Egr3;Eomes;Fezf2;Foxg1;Icos;Kcng1;Kcnip2;Lbx1;Loxl2;Mfi2;Neurod1;Neurod2;Nr4a3;Onecut1;Pkp3;Prdm8;Ptk2b;Rab44;Rtn4rl2;Slc18a3;Slc6a5;Tac2;Tbr1
14	exercise	stark__BYAATTARH	3.42	0.0539	En1; En2 (inferredBy_Orthology).	Alx1; Alx3; Alx4; Arx; Barx2; Dlx3; Emx2; Esx1; Gsx2; Hoxa1; Hoxa3; Hoxd1; Isl1; Lbx2; Lhx2; Lhx3; Lhx4; Lhx5; Lhx6; Lhx8; Lhx9; Mnx1; Msx1; Msx3; Nkx1-2; Nobox; Otp; Pax4; Pdx1; Prrx2; Rax; Shox2; Uncx; Vax1; Vax2; Vsx1 (inferredBy_MotifSimilarity). Emx1; Evx1; Evx2; Gbx1; Gbx2; Gsx1; Hesx1; Hoxb1; Hoxb2; Isl2; Isx; Lbx1; Lhx1; Lmx1a; Lmx1b; Mixl1; Msx2; Nkx1-1; Noto; Prop1; Prrx1; Prrxl1; Tlx2;…	10	174	Cyp26a1;Egr3;Eomes;Fezf2;Lbx1;Neurod1;Neurod2;Onecut1;Pkp3;Tbr1
15	exercise	predrem__nrMotif1106	3.41	0.0538			12	254	Chrm1;Egr4;Fezf2;Foxg1;Gpr65;Kcnj4;Lox;Mir541;Neurod2;Slc14a2;Wdr69;Xirp2
16	exercise	taipale__RAXL1_DBD_NYAATTAN	3.37	0.0535		Alx1; Alx3; Alx4; Arx; Barhl1; Emx2; En1; En2; Gbx1; Gbx2; Lhx2; Lhx3; Lhx4; Lhx8; Lhx9; Msx1; Msx3; Nkx1-2; Nobox; Pax6; Phox2a; Prrx1; Prrx2; Rax; Shox2; Uncx; Vax2; Vsx1; Vsx2 (inferredBy_MotifSimilarity). Bsx; Dlx1; Dlx4; Dlx6; Dmbx1; Emx1; Esx1; Gsx1; Gsx2; Hesx1; Hoxa1; Hoxa6; Hoxa7; Hoxb6; Hoxb7; Hoxc6; Isx; Lbx1; Lbx2; Lhx6; Lmx1a; Lmx1b; Mixl1; Mnx1; Msx2; Nkx1-1; Noto; Otp; Pou6f1; Prop…	15	411	Baiap2l2;Cyp26a1;Egr3;Eomes;Fezf2;Lbx1;Lhx6;Neurod1;Neurod2;Onecut1;Pkp3;Rnf39;Slc6a5;Tac2;Tbr1
17	exercise	taipale_cyt_meth__RAX_YTAATTAN_eDBD_meth	3.37	0.0534	Rax (inferredBy_Orthology).	Alx3; Evx1; Gsx2; Hoxa2; Hoxd3; Vax1; Vax2 (inferredBy_MotifSimilarity). Emx1; Emx2; En1; En2; Esx1; Evx2; Gbx1; Gbx2; Hoxa5; Hoxa6; Hoxa7; Hoxb2; Hoxb5; Hoxb6; Hoxb7; Hoxc5; Hoxc6; Lhx4; Lmx1a; Pdx1; Prrxl1; Uncx; Vsx1; Vsx2 (inferredBy_MotifSimilarity_n_Orthology).	15	396	Baiap2l2;Cyp26a1;Egr3;Eomes;Fezf2;Lbx1;Lhx6;Neurod1;Neurod2;Onecut1;Pkp3;Rnf39;Slc6a5;Tac2;Tbr1
18	exercise	taipale_cyt_meth__EGR2_NMCGCCCACGCAN_FL_meth_repr	3.36	0.0534	Egr2 (inferredBy_Orthology).	Egr1; Egr3; Egr4; Sp4 (inferredBy_MotifSimilarity). Wt1 (inferredBy_MotifSimilarity_n_Orthology).	17	503	Chat;Ddn;Egr3;Emx1;Fezf2;Foxg1;Fst;H60b;Il22;Kcnip2;Mov10l1;Neurod1;Neurod2;Nr4a3;Onecut1;Slc18a3;Vgll3
19	exercise	cisbp__M0972	3.36	0.0533	Uncx (directAnnotation).	Alx1; Alx3; Alx4; Arx; En1; En2; Esx1; Gbx1; Isl2; Lbx2; Lhx2; Lhx3; Lhx4; Lhx6; Lhx8; Lhx9; Lmx1b; Msx1; Nkx1-2; Nobox; Noto; Pax6; Pax7; Phox2a; Pou1f1; Prop1; Prrx1; Prrx2; Rax; Rhox6; Sebox; Shox2; Vsx1 (inferredBy_MotifSimilarity). Dlx1; Dlx4; Dlx6; Emx1; Emx2; Gbx2; Gsx1; Gsx2; Hesx1; Isl1; Isx; Lbx1; Lhx1; Lhx5; Lmx1a; Mixl1; Msx2; Msx3; Nkx1-1; Otp; Pax4; Pou6f1; Prrxl1; Tlx2; Traf4; Vsx2…	18	546	Baiap2l2;Cyp26a1;Egr3;Eomes;Fezf2;Fst;Kcng1;Lbx1;Lhx6;Neurod1;Neurod2;Nr4a3;Onecut1;Pkp3;Rnf39;Slc6a5;Tac2;Tbr1
20	exercise	taipale_cyt_meth__ALX3_CYAATTAN_eDBD_meth	3.36	0.0533	Alx3 (inferredBy_Orthology).	En1; Lhx4; Prrx2; Vsx1 (inferredBy_MotifSimilarity). Alx4; Arx; Bsx; Dlx1; Dlx4; Dlx6; Emx1; Hoxd1; Lhx3; Lhx6; Lhx8; Nkx1-1; Nkx1-2; Phox2a; Vax1; Vax2 (inferredBy_MotifSimilarity_n_Orthology).	13	302	Cyp26a1;Egr3;Fezf2;Lbx1;Lhx6;Neurod1;Neurod2;Onecut1;Pkp3;Rnf39;Slc6a5;Tac2;Tbr1
21	exercise	cisbp__M5301	3.35	0.0533	Barx1 (inferredBy_Orthology).	Barx2; Evx1; Hoxd3; Pdx1 (inferredBy_MotifSimilarity). Gsx2; Hoxa6; Hoxa7; Hoxb6; Hoxb7; Hoxc6 (inferredBy_MotifSimilarity_n_Orthology).	16	476	Cyp26a1;Egr3;Eomes;Fezf2;Fst;Kcng1;Lbx1;Lhx6;Neurod1;Neurod2;Nr4a3;Onecut1;Pkp3;Rnf39;Tac2;Tbr1
22	exercise	cisbp__M5772	3.34	0.0532		Alx1; Alx3; Alx4; Arx; Barhl1; Emx2; En1; En2; Gbx1; Gbx2; Gsx2; Lbx2; Lhx2; Lhx3; Lhx4; Lhx8; Lhx9; Msx1; Msx3; Nkx1-2; Nobox; Pax6; Pax7; Phox2a; Prrx1; Prrx2; Rax; Shox2; Uncx; Vax2; Vsx1 (inferredBy_MotifSimilarity). Bsx; Dlx1; Dlx4; Dlx6; Dmbx1; Emx1; Esx1; Gsx1; Hesx1; Hoxa6; Hoxa7; Hoxb6; Hoxb7; Hoxc6; Isx; Lbx1; Lhx6; Lmx1a; Lmx1b; Mixl1; Mnx1; Msx2; Nkx1-1; Noto; Otp; Prop1; Tlx2; Traf4;…	15	405	Baiap2l2;Cyp26a1;Egr3;Eomes;Fezf2;Lbx1;Lhx6;Neurod1;Neurod2;Onecut1;Pkp3;Rnf39;Slc6a5;Tac2;Tbr1
23	exercise	taipale_cyt_meth__UNCX_KTAATTAN_eDBD	3.34	0.0531	Uncx (inferredBy_Orthology).	Alx3; Alx4; Arx; En1; En2; Lhx4; Lhx8 (inferredBy_MotifSimilarity_n_Orthology).	15	491	Baiap2l2;Cyp26a1;Egr3;Eomes;Fezf2;Lbx1;Lhx6;Neurod1;Neurod2;Onecut1;Pkp3;Rnf39;Slc6a5;Tac2;Tbr1
24	exercise	flyfactorsurvey__CG9876_Cell_FBgn0034821	3.34	0.0531		Alx3; En2; Esx1; Hoxa3; Lhx3; Nkx1-2; Otp (inferredBy_MotifSimilarity). Emx1; Emx2; En1; Gbx1; Gbx2; Gsx1; Gsx2; Lhx2; Lhx6; Lhx8; Lhx9; Noto; Pou6f1; Uncx (inferredBy_MotifSimilarity_n_Orthology).	13	262	Baiap2l2;Cyp26a1;Egr3;Eomes;Fezf2;Lbx1;Neurod1;Neurod2;Onecut1;Pkp3;Rnf39;Slc6a5;Tbr1
25	exercise	transfac_public__M00099	3.33	0.0531	Prrx2 (directAnnotation).	Alx1; Alx3; Alx4; Arx; En2; Gbx1; Lhx3; Noto; Otp; Rax; Shox2; Uncx; Vsx1 (inferredBy_MotifSimilarity). Emx2; En1; Esx1; Gbx2; Isx; Lbx2; Lhx2; Lhx4; Lhx6; Lhx8; Lhx9; Nkx1-1; Nkx1-2; Prop1; Prrx1; Tlx2; Zfhx2 (inferredBy_MotifSimilarity_n_Orthology).	17	454	Baiap2l2;Chat;Cyp26a1;Egr3;Eomes;Fezf2;Foxg1;Lbx1;Neurod1;Neurod2;Neurod6;Onecut1;Pkp3;Rnf39;Slc18a3;Slc6a5;Tbr1
26	exercise	taipale_cyt_meth__ARX_CYAATTAN_eDBD_meth	3.33	0.053	Arx (inferredBy_Orthology).	Alx1; Alx3; Barx2; En1; Gbx1; Gsx2; Hoxa1; Lhx3; Lhx4; Pax6; Prrx2; Shox2; Uncx; Vax2; Vsx1 (inferredBy_MotifSimilarity). Alx4; Dmbx1; En2; Esx1; Gbx2; Gsx1; Hoxd3; Isx; Lhx6; Lhx8; Lhx9; Lmx1b; Mixl1; Phox2a; Prrx1; Prrxl1; Rax; Tlx2; Vax1; Vsx2 (inferredBy_MotifSimilarity_n_Orthology).	15	413	Baiap2l2;Cyp26a1;Egr3;Eomes;Fezf2;Lbx1;Lhx6;Neurod1;Neurod2;Onecut1;Pkp3;Rnf39;Slc6a5;Tac2;Tbr1
27	exercise	cisbp__M0935	3.3	0.0528	Dlx4 (directAnnotation).	Dlx1; Dlx2; Dlx3; Dlx5; Nkx6-1 (inferredBy_MotifSimilarity). Dlx6 (inferredBy_MotifSimilarity_n_Orthology).	16	454	Baiap2l2;Cyp26a1;Egr3;Fezf2;Foxg1;Fst;Lbx1;Lhx6;Neurod1;Neurod2;Nr4a3;Onecut1;Pkp3;Slc6a5;Tac2;Tbr1
28	exercise	cisbp__M1005	3.3	0.0527	Alx1 (directAnnotation).	Alx3; Alx4; Arx; En2; Gbx1; Isl2; Lbx2; Lhx2; Lhx4; Lhx9; Msx1; Msx3; Nobox; Noto; Prop1; Prrx2; Rax; Sebox; Shox2; Uncx; Vax2; Vsx1 (inferredBy_MotifSimilarity). Barhl1; Barhl2; Dmbx1; Emx1; Emx2; En1; Esx1; Gbx2; Gsx1; Gsx2; Hesx1; Isx; Lbx1; Lhx1; Lhx3; Lhx5; Lhx6; Lhx8; Lmx1a; Lmx1b; Mixl1; Nkx1-1; Nkx1-2; Otp; Prrx1; Prrxl1; Tlx2; Traf4; Vsx2; Zbtb49; Zfhx2 (inferredBy_MotifSimilarity_n_Orth…	19	702	Baiap2l2;Cyp26a1;Egr3;Eomes;Fezf2;Foxg1;Fst;Kcng1;Lbx1;Lhx6;Neurod1;Neurod2;Nr4a3;Onecut1;Pkp3;Rnf39;Slc6a5;Tac2;Tbr1
29	exercise	taipale_cyt_meth__ALX3_CYAATTAN_eDBD	3.29	0.0527	Alx3 (inferredBy_Orthology).	Alx1; Alx4; Arx; En1; Gbx1; Hoxa1; Lhx2; Lhx3; Lhx4; Lhx9; Prrx2; Shox2; Uncx; Vsx1 (inferredBy_MotifSimilarity). Dmbx1; En2; Esx1; Gbx2; Gsx1; Gsx2; Isx; Lbx2; Lhx8; Lmx1b; Mixl1; Nkx6-2; Prop1; Prrx1; Prrxl1; Rax; Vsx2; Zfhx2 (inferredBy_MotifSimilarity_n_Orthology).	12	264	Baiap2l2;Cyp26a1;Eomes;Fezf2;Lbx1;Neurod1;Neurod2;Onecut1;Pkp3;Rnf39;Slc6a5;Tbr1
30	exercise	cisbp__M1630	3.29	0.0527	Tbx3 (directAnnotation).	Eomes; Tbr1; Tbx2; Tbx20; Tbx4; Tbx5 (inferredBy_MotifSimilarity). T; Tbx1; Tbx10; Tbx15; Tbx18; Tbx19; Tbx21; Tbx6 (inferredBy_MotifSimilarity_n_Orthology).	12	244	9130024F11Rik;Actg2;Fezf2;Fst;H60b;Mesp2;Mfi2;Neurod2;Nr4a3;Rnf39;Rtn4rl2;Satb2
31	exercise	transfac_pro__M01971	3.29	0.0526	Lhx3 (directAnnotation).	Lhx1; Lhx4; Lhx5; Lmx1a; Lmx1b; Phox2b; Pou1f1; Pou3f4; Uncx (inferredBy_MotifSimilarity).	18	705	Atoh7;Baiap2l2;Chat;Cyp26a1;Eomes;Fezf2;Foxg1;Lbx1;Mesp2;Neurod1;Neurod2;Nr4a3;Onecut1;Rab44;Slc18a3;Slc6a5;Tac2;Tbr1
32	exercise	transfac_pro__M06564	3.29	0.0526			12	287	Bnc2;Chrdl2;Egr3;Foxg1;Kcng3;Kcnh3;Mall;Nfe2;Prdm8;Satb2;Slc14a2;Vdr
33	exercise	transfac_pro__M01339	3.28	0.0526	Pax7 (directAnnotation).	Arx; Esx1; Hoxc4; Hoxc5; Lhx4; Prrx2; Uncx; Vsx1 (inferredBy_MotifSimilarity). Emx1; Emx2; Gbx1; Gbx2; Lhx3; Lhx6; Lhx8; Otp; Pou6f1; Zfhx2 (inferredBy_MotifSimilarity_n_Orthology).	18	561	Atoh7;Bnc2;Bves;Cyp26a1;Eomes;Fezf2;Foxg1;Fst;Lbx1;Neurod1;Neurod2;Nr4a3;Onecut1;Pkp3;Rab44;Rnf39;Slc6a5;Tbr1
34	exercise	cisbp__M4963	3.28	0.0526	Mnx1 (inferredBy_Orthology).	Evx1; Hoxa1; Hoxd1; Hoxd3; Lhx9; Vax1; Vax2 (inferredBy_MotifSimilarity). Dlx1; Dlx4; Dlx6; Emx1; En1; En2; Esx1; Gbx1; Gbx2; Hoxa4; Hoxa5; Hoxa6; Hoxa7; Hoxb2; Hoxb4; Hoxb5; Hoxb6; Hoxb7; Hoxc4; Hoxc6; Hoxd4; Lbx1; Lbx2; Lmx1b; Meox1; Meox2; Nkx1-1; Nkx1-2; Nkx6-2; Noto; Pdx1; Prop1; Prrx1; Prrxl1; Uncx (inferredBy_MotifSimilarity_n_Orthology).	17	435	Baiap2l2;Cyp26a1;Egr3;Eomes;Fezf2;Fst;Kcng1;Lbx1;Neurod1;Neurod2;Nr4a3;Onecut1;Pkp3;Rnf39;Slc6a5;Tac2;Tbr1
35	exercise	transfac_public__M00455	3.28	0.0526	Arid3c (inferredBy_Orthology).		29	1098	Atoh7;Baiap2l2;Bcl2a1d;Chat;Chrm1;Cyp26a1;Egr3;Eomes;Fezf2;Foxg1;Fst;Kcng1;Kcnip2;Lbx1;Loxl2;Mfi2;Neurod1;Neurod2;Nr4a3;Onecut1;Pkp3;Prdm8;Ptk2b;Rab44;Rtn4rl2;Slc18a3;Slc6a5;Tac2;Tbr1
36	exercise	cisbp__M5045	3.28	0.0526	En1; En2 (inferredBy_Orthology).	Alx1; Alx4; Arx; Gbx1; Hoxd3; Lbx2; Lhx2; Lhx6; Lhx9; Nkx6-1; Prrx2; Shox2; Uncx; Vsx1 (inferredBy_MotifSimilarity). Alx3; Barhl1; Barhl2; Bsx; Dlx1; Dlx4; Dlx6; Emx1; Emx2; Esx1; Gbx2; Hesx1; Hoxa1; Hoxa6; Hoxa7; Hoxb1; Hoxb2; Hoxb3; Hoxb6; Hoxb7; Hoxc6; Hoxd1; Isx; Lbx1; Lhx1; Lhx3; Lhx4; Lhx5; Lmx1a; Lmx1b; Meox2; Mixl1; Msx1; Msx2; Nkx1-1; Nkx1-2; Nkx6-2; Nobox; Otp; Prop1; Prrx1; Prrxl1; Rax…	15	401	Baiap2l2;Cyp26a1;Egr3;Eomes;Fezf2;Kcng1;Lbx1;Neurod1;Neurod2;Onecut1;Pkp3;Rnf39;Slc6a5;Tac2;Tbr1
37	exercise	cisbp__M1078	3.28	0.0525			17	527	Atoh7;Baiap2l2;Bnc2;Cyp26a1;Eomes;Fezf2;Foxg1;Fst;Lbx1;Neurod1;Neurod2;Nr4a3;Onecut1;Pkp3;Slc6a5;Tac2;Tbr1
38	exercise	taipale__UNCX_DBD_NYAATTAN	3.28	0.0525	Uncx (inferredBy_Orthology).	Alx1; Alx3; Alx4; Arx; En1; Esx1; Gbx1; Gsx2; Isl2; Lbx2; Lhx2; Lhx3; Lhx4; Lhx6; Lhx8; Lhx9; Lmx1a; Msx1; Nkx1-2; Nobox; Noto; Pax6; Pax7; Phox2a; Pou1f1; Pou3f2; Prop1; Prrx1; Prrx2; Rax; Rhox6; Sebox; Shox2; Vax2; Vsx1 (inferredBy_MotifSimilarity). Dlx1; Dlx4; Dlx6; Dmbx1; Emx1; Emx2; En2; Gbx2; Gsx1; Hesx1; Isx; Lbx1; Lhx1; Lhx5; Lmx1b; Mixl1; Nkx1-1; Otp; Pou6f1; Prrxl1; Tlx2; Traf4; Vsx2; Z…	13	317	Baiap2l2;Cyp26a1;Egr3;Eomes;Fezf2;Lbx1;Neurod1;Neurod2;Onecut1;Pkp3;Rnf39;Slc6a5;Tbr1
39	exercise	taipale__BARX1_DBD_NYNATTAN	3.27	0.0525	Barx1 (inferredBy_Orthology).	Barx2; Hoxd3; Pdx1 (inferredBy_MotifSimilarity). Hoxa6; Hoxa7; Hoxb6; Hoxb7; Hoxc6 (inferredBy_MotifSimilarity_n_Orthology).	16	494	Cyp26a1;Egr3;Eomes;Fezf2;Fst;Kcng1;Lbx1;Lhx6;Neurod1;Neurod2;Nr4a3;Onecut1;Pkp3;Rnf39;Tac2;Tbr1
40	exercise	transfac_pro__M07386	3.27	0.0525	Lmx1a; Lmx1b (directAnnotation).		19	682	Ano2;Baiap2l2;Cyp26a1;Egr3;Eomes;Fezf2;Foxg1;H60b;Lbx1;Neurod2;Nr4a3;Onecut1;Pkp3;Rnf39;Scn10a;Slc6a5;Tac2;Tbr1;Wnt10a
41	exercise	cisbp__M1624	3.27	0.0524		Eomes; Tbr1; Tbx2; Tbx20; Tbx3 (inferredBy_MotifSimilarity). Tbx1; Tbx10; Tbx15; Tbx18; Tbx19; Tbx21; Tbx4; Tbx6 (inferredBy_MotifSimilarity_n_Orthology).	20	699	9130024F11Rik;Emx1;F7;Fezf2;Foxg1;Fst;Itpka;Kcnh3;Kcnj4;Loxl2;Mesp2;Mfi2;Neurod2;Nkg7;Nr4a3;Rnf39;Rtn4rl2;Satb2;Tcp11;Trhr
42	exercise	cisbp__M5942	3.26	0.0524	Uncx (inferredBy_Orthology).	Alx1; Alx3; Alx4; Arx; En1; Esx1; Gbx1; Gsx2; Hoxc5; Isl2; Lbx2; Lhx2; Lhx3; Lhx4; Lhx6; Lhx9; Lmx1a; Msx1; Nkx1-2; Nobox; Noto; Pax6; Pax7; Phox2a; Pou1f1; Pou3f2; Prop1; Prrx1; Prrx2; Rax; Rhox6; Sebox; Shox2; Vax2; Vsx1 (inferredBy_MotifSimilarity). Dlx1; Dlx4; Dlx6; Dmbx1; Emx1; Emx2; En2; Gbx2; Gsx1; Hesx1; Isx; Lbx1; Lhx1; Lhx5; Lhx8; Lmx1b; Mixl1; Nkx1-1; Otp; Pou6f1; Prrxl1; Tlx2; Traf4; …	13	323	Baiap2l2;Cyp26a1;Egr3;Eomes;Fezf2;Lbx1;Neurod1;Neurod2;Onecut1;Pkp3;Rnf39;Slc6a5;Tbr1
43	exercise	cisbp__M0963	3.26	0.0524	Lhx3 (directAnnotation).	Lhx1; Lhx4; Lhx5; Lmx1a; Lmx1b; Prop1 (inferredBy_MotifSimilarity). En1; En2 (inferredBy_MotifSimilarity_n_Orthology).	16	453	Baiap2l2;Cyp26a1;Egr3;Eomes;Fezf2;Foxg1;Fst;Lbx1;Neurod1;Neurod2;Nr4a3;Onecut1;Pkp3;Slc6a5;Tac2;Tbr1
44	exercise	flyfactorsurvey__inv_SOLEXA_2_FBgn0001269	3.26	0.0523	En1; En2 (inferredBy_Orthology).	Alx1; Alx4; Arx; Gbx1; Hoxd3; Lbx2; Lhx2; Lhx9; Prrx2; Shox2; Uncx; Vsx1 (inferredBy_MotifSimilarity). Alx3; Dlx1; Dlx4; Dlx6; Emx1; Emx2; Esx1; Gbx2; Hesx1; Hoxa1; Hoxa6; Hoxa7; Hoxb2; Hoxb3; Hoxb6; Hoxb7; Hoxc6; Isx; Lhx1; Lhx4; Lhx5; Lmx1b; Mixl1; Nkx1-1; Nkx1-2; Nkx6-2; Otp; Prop1; Prrx1; Prrxl1; Rax; Tlx1; Tlx2; Tlx3; Vsx2 (inferredBy_MotifSimilarity_n_Orthology).	15	387	Baiap2l2;Cyp26a1;Egr3;Eomes;Fezf2;Kcng1;Lbx1;Neurod1;Neurod2;Onecut1;Pkp3;Rnf39;Slc6a5;Tac2;Tbr1
45	exercise	transfac_public__M00246	3.25	0.0522	Egr2 (directAnnotation).	Egr1; Egr3; Egr4 (inferredBy_MotifSimilarity). Wt1 (inferredBy_MotifSimilarity_n_Orthology).	13	272	Bcl2a1d;Car12;Egr3;Emx1;Fezf2;Foxg1;Fst;Il22;Mov10l1;Neurod1;Nr4a3;Onecut1;Vgll3
46	exercise	transfac_pro__M00489	3.25	0.0522	Nkx6-2 (directAnnotation).		12	282	Chrm1;Egr3;Fezf2;Fgf5;Foxg1;Fst;Lbx1;Neurod2;Nr4a3;Onecut1;Pkp3;Slc6a5
47	exercise	cisbp__M1952	3.25	0.0522	Pdx1 (directAnnotation).	Emx2; En2 (inferredBy_MotifSimilarity). Emx1; Evx1; Evx2; Hoxb2; Noto; Vax1 (inferredBy_MotifSimilarity_n_Orthology).	10	169	Cyp26a1;Eomes;Fezf2;Fst;Lbx1;Neurod2;Pkp3;Slc6a5;Tbr1;Trhr
48	exercise	cisbp__M5757	3.24	0.0522	Prrx2 (inferredBy_Orthology).	Alx1; Alx3; Alx4; Arx; Barhl1; En1; Gbx1; Gbx2; Lhx2; Lhx9; Msx3; Nobox; Rax; Shox2; Uncx; Vsx1 (inferredBy_MotifSimilarity). Bsx; Dmbx1; En2; Esx1; Gsx1; Gsx2; Hesx1; Hoxa6; Hoxa7; Hoxb6; Hoxb7; Hoxc6; Isx; Lbx1; Lbx2; Lhx3; Lhx4; Mixl1; Msx1; Msx2; Nkx1-1; Nkx1-2; Noto; Otp; Prop1; Prrx1; Tlx2; Vsx2; Zbtb49 (inferredBy_MotifSimilarity_n_Orthology).	16	557	Baiap2l2;Cyp26a1;Egr3;Eomes;Fezf2;Lbx1;Lhx6;Neurod1;Neurod2;Nr4a3;Onecut1;Pkp3;Rnf39;Slc6a5;Tac2;Tbr1
49	exercise	taipale_cyt_meth__PHOX2A_CYAATTAN_eDBD	3.24	0.0521	Phox2a (inferredBy_Orthology).	En1 (inferredBy_MotifSimilarity). Alx3; Alx4; Bsx; Emx1; Gm28308; Hoxa1; Hoxa2; Hoxa5; Hoxb1; Hoxb2; Hoxd1; Lhx4; Lhx6; Lhx8; Nkx1-1; Nkx1-2; Prrxl1; Vax1; Vax2; Vsx1 (inferredBy_MotifSimilarity_n_Orthology).	22	979	Baiap2l2;Cyp26a1;Egr3;Eomes;Fezf2;Fst;H60b;Krt20;Lbx1;Lhx6;Neurod1;Neurod2;Nr4a3;Onecut1;Pkp3;Prdm8;Rab44;Rnf39;Slc6a5;Tac2;Tbr1;Vdr
50	exercise	cisbp__M1000	3.23	0.052	Arx (directAnnotation).	Alx1; Alx3; Alx4; Barhl1; Emx2; En1; En2; Esx1; Gbx1; Gbx2; Lbx2; Lhx2; Lhx4; Lhx6; Lhx8; Lhx9; Msx1; Msx3; Nkx1-2; Nobox; Noto; Pax4; Pax6; Pax7; Phox2a; Pou1f1; Prop1; Prrx1; Prrx2; Rax; Sebox; Shox2; Uncx; Vax2; Vsx1; Vsx2 (inferredBy_MotifSimilarity). Dlx1; Dlx4; Dlx6; Emx1; Gsx1; Gsx2; Hesx1; Hoxa6; Hoxa7; Hoxb6; Hoxb7; Hoxc6; Isx; Lbx1; Lhx1; Lhx3; Lhx5; Lmx1a; Lmx1b; Mixl1; Mnx1; Msx2; Nkx…	14	383	Baiap2l2;Cyp26a1;Egr3;Eomes;Fezf2;Lbx1;Neurod1;Neurod2;Onecut1;Pkp3;Rnf39;Slc6a5;Tac2;Tbr1
51	exercise	cisbp__M1631	3.22	0.052	Tbx20 (directAnnotation).	Eomes; Tbr1; Tbx15; Tbx2; Tbx3; Tbx4; Tbx5 (inferredBy_MotifSimilarity). Mga; T; Tbx1; Tbx10; Tbx18; Tbx19; Tbx21; Tbx6 (inferredBy_MotifSimilarity_n_Orthology).	17	555	9130024F11Rik;Actg2;Emx1;Foxg1;Fst;Lox;Mesp2;Mfi2;Neurod2;Nr4a3;Rnf39;Rtn4rl2;Satb2;Slc17a7;Tbr1;Tcp11;Zfp831
52	exercise	transfac_pro__M01492	3.22	0.052			14	425	Chrm1;Egr4;Emx1;Eomes;Fezf2;Foxg1;Fst;Kcnh3;Neurod1;Neurod2;Nr4a3;Onecut1;Pla2g5;Slc6a5
53	exercise	cisbp__M1083	3.22	0.052		Alx1; Alx3; Alx4; Arx; Emx2; En1; En2; Esx1; Gbx1; Gbx2; Gsx2; Hoxb4; Hoxc4; Hoxc5; Hoxd1; Lbx2; Lhx2; Lhx4; Lhx6; Lhx9; Msx1; Nkx1-2; Nobox; Noto; Otp; Pax4; Pax6; Pax7; Phox2a; Phox2b; Pou1f1; Pou3f1; Pou3f2; Prop1; Prrx1; Prrx2; Rax; Rhox6; Sebox; Shox2; Uncx; Vax1; Vax2; Vsx1 (inferredBy_MotifSimilarity). Dlx1; Dlx4; Dlx6; Dmbx1; Emx1; Evx1; Evx2; Hesx1; Hoxa1; Hoxb1; Isx; Lbx1; Lhx1; Lhx3; L…	14	402	Baiap2l2;Cyp26a1;Egr3;Eomes;Fezf2;Lbx1;Neurod1;Neurod2;Onecut1;Pkp3;Rnf39;Slc6a5;Tac2;Tbr1
54	exercise	cisbp__M1117	3.22	0.052		Alx1; Alx3; Alx4; Arx; En2; Esx1; Hoxa1; Hoxc5; Hoxd1; Lbx2; Lhx2; Lhx4; Lhx6; Msx1; Nobox; Noto; Otp; Pax6; Pax7; Phox2a; Phox2b; Pou3f1; Pou3f2; Prop1; Prrx1; Prrx2; Rhox6; Shox2; Uncx; Vax2; Vsx1 (inferredBy_MotifSimilarity). En1; Gbx1; Isx; Lhx1; Lhx3; Lhx5; Lhx8; Lhx9; Lmx1a; Lmx1b; Pou6f1; Prrxl1; Rax; Vsx2; Zfhx2 (inferredBy_MotifSimilarity_n_Orthology).	17	587	Baiap2l2;Cyp26a1;Egr3;Eomes;Fezf2;Foxg1;Fst;Kcng1;Lbx1;Neurod1;Neurod2;Nr4a3;Onecut1;Pkp3;Slc6a5;Tac2;Tbr1
55	exercise	cisbp__M1004	3.22	0.052	Alx1 (directAnnotation).	Alx3; Alx4; Arx; En1; En2; Gbx1; Lbx2; Lhx2; Lhx4; Lhx9; Msx1; Msx3; Nobox; Pax6; Prop1; Prrx2; Rax; Sebox; Shox2; Uncx; Vax2; Vsx1 (inferredBy_MotifSimilarity). Dlx1; Dlx4; Dlx6; Dmbx1; Esx1; Gbx2; Gsx2; Hesx1; Isx; Lbx1; Lhx1; Lhx3; Lhx5; Lmx1a; Lmx1b; Mixl1; Nkx1-1; Nkx1-2; Otp; Prrx1; Prrxl1; Tlx2; Traf4; Vsx2; Zbtb49 (inferredBy_MotifSimilarity_n_Orthology).	14	404	Baiap2l2;Cyp26a1;Egr3;Eomes;Fezf2;Lbx1;Neurod1;Neurod2;Onecut1;Pkp3;Rnf39;Slc6a5;Tac2;Tbr1
56	exercise	taipale_cyt_meth__SHOX_CYAATTAN_eDBD	3.22	0.0519		Alx1; Alx3; Alx4; Arx; Gbx1; Hoxa1; Lhx3; Lhx4; Lhx9; Msx1; Noto; Pax6; Prop1; Prrx2; Sebox; Shox2; Uncx; Vax2; Vsx1 (inferredBy_MotifSimilarity). Dmbx1; Emx1; Emx2; En1; En2; Esx1; Gbx2; Gsx1; Gsx2; Isx; Lbx2; Lhx2; Lhx6; Lhx8; Lmx1a; Lmx1b; Mixl1; Nkx1-1; Nkx1-2; Otp; Prrx1; Prrxl1; Rax; Traf4; Vsx2; Zfhx2 (inferredBy_MotifSimilarity_n_Orthology).	14	401	Baiap2l2;Cyp26a1;Egr3;Eomes;Fezf2;Lbx1;Neurod1;Neurod2;Onecut1;Pkp3;Rnf39;Slc6a5;Tac2;Tbr1
57	exercise	cisbp__M3176	3.22	0.0519	Egr2 (inferredBy_Orthology).	Egr1; Egr3; Egr4 (inferredBy_MotifSimilarity). Wt1 (inferredBy_MotifSimilarity_n_Orthology).	13	277	Bcl2a1d;Car12;Egr3;Emx1;Fezf2;Foxg1;Fst;Il22;Mov10l1;Neurod1;Nr4a3;Onecut1;Vgll3
58	exercise	taipale__PRRX1_full_NYAATTAN	3.21	0.0519	Prrx1 (inferredBy_Orthology).	Alx1; Alx3; Alx4; Arx; Barhl1; Emx2; En1; Gbx1; Gbx2; Lbx2; Lhx2; Lhx3; Lhx8; Lhx9; Msx3; Nobox; Pax6; Prrx2; Rax; Shox2; Uncx; Vsx1 (inferredBy_MotifSimilarity). Bsx; Dlx1; Dlx4; Dlx6; Dmbx1; Emx1; En2; Esx1; Gsx1; Gsx2; Hesx1; Hoxa6; Hoxa7; Hoxb6; Hoxb7; Hoxc6; Isx; Lbx1; Lhx4; Lhx6; Lmx1a; Lmx1b; Mixl1; Mnx1; Msx1; Msx2; Nkx1-1; Nkx1-2; Noto; Otp; Prop1; Tlx2; Vsx2; Zbtb49; Zfhx2 (inferredBy_M…	14	356	Baiap2l2;Cyp26a1;Egr3;Eomes;Fezf2;Lbx1;Neurod1;Neurod2;Onecut1;Pkp3;Rnf39;Slc6a5;Tac2;Tbr1
59	exercise	taipale_cyt_meth__LMX1B_NWWYTAATTAN_eDBD_meth	3.21	0.0519	Lmx1b (inferredBy_Orthology).	En1; En2; Gbx1; Gbx2; Lhx4; Otp; Prrxl1; Uncx (inferredBy_MotifSimilarity_n_Orthology).	14	398	Baiap2l2;Cyp26a1;Egr3;Eomes;Fezf2;Lbx1;Neurod1;Neurod2;Onecut1;Pkp3;Rnf39;Slc6a5;Tac2;Tbr1
60	exercise	cisbp__M1020	3.21	0.0519	Alx4 (directAnnotation).	Alx1; Alx3; Arx; En1; Gbx1; Lbx2; Lhx2; Lhx4; Lhx9; Msx3; Nobox; Prop1; Prrx2; Rax; Shox2; Uncx; Vsx1 (inferredBy_MotifSimilarity). Dlx1; Dlx4; Dlx6; En2; Esx1; Gbx2; Hesx1; Isx; Lbx1; Lhx1; Lhx3; Lhx5; Lmx1a; Lmx1b; Mixl1; Msx1; Msx2; Nkx1-1; Nkx1-2; Otp; Prrx1; Tlx2; Traf4; Vsx2; Zbtb49 (inferredBy_MotifSimilarity_n_Orthology).	19	709	Baiap2l2;Cyp26a1;Egr3;Eomes;Fezf2;Foxg1;Fst;Kcng1;Lbx1;Lhx6;Neurod1;Neurod2;Nr4a3;Onecut1;Pkp3;Rnf39;Slc6a5;Tac2;Tbr1
61	exercise	cisbp__M4993	3.21	0.0519	Hlx (inferredBy_Orthology).		14	383	Chrm1;Cyp26a1;Egr3;Fezf2;Foxg1;Lbx1;Mesp2;Neurod1;Neurod2;Nr4a3;Onecut1;Pkp3;Slc6a5;Tbr1
62	exercise	taipale_cyt_meth__ALX4_CYAATTAN_eDBD	3.2	0.0518	Alx4 (inferredBy_Orthology).	Barx2; En1; Prrx2; Vsx1 (inferredBy_MotifSimilarity). Alx3; Arx; Bsx; Dlx1; Dlx4; Dlx6; Emx1; Esx1; Hoxd1; Lhx3; Lhx4; Lhx6; Lhx8; Msx2; Nkx1-1; Nkx1-2; Phox2a; Vax1; Vax2 (inferredBy_MotifSimilarity_n_Orthology).	10	169	Egr3;Fezf2;Lbx1;Neurod1;Neurod2;Pkp3;Rnf39;Slc6a5;Tac2;Tbr1
63	exercise	taipale__GSX2_DBD_NNYMATTANN	3.2	0.0518	Gsx2 (inferredBy_Orthology).	Alx1; Arx; Hoxc5; Lbx2; Lhx2; Lhx9; Pax6; Prrx2; Shox2; Vsx1 (inferredBy_MotifSimilarity). Alx3; Dbx1; Dbx2; Dlx1; Dlx4; Dlx6; Emx1; Emx2; En1; En2; Gbx1; Gbx2; Gsx1; Hoxa1; Hoxa6; Hoxa7; Hoxb1; Hoxb3; Hoxb6; Hoxb7; Hoxc6; Hoxd1; Isx; Lbx1; Lhx6; Lhx8; Nkx1-1; Nkx1-2; Nkx6-1; Nkx6-2; Nkx6-3; Prop1; Prrx1; Tlx1; Tlx2; Tlx3; Uncx; Vsx2 (inferredBy_MotifSimilarity_n_Orthology).	10	156	Cyp26a1;Egr3;Fezf2;Lbx1;Neurod2;Nr4a3;Onecut1;Pkp3;Tac2;Tbr1
64	exercise	cisbp__M5755	3.19	0.0517	Prrx1 (inferredBy_Orthology).	Alx1; Alx3; Alx4; Arx; Barhl1; Emx2; En1; Gbx1; Gbx2; Lhx2; Lhx3; Lhx8; Lhx9; Msx3; Nobox; Pax6; Prrx2; Rax; Shox2; Uncx; Vsx1 (inferredBy_MotifSimilarity). Bsx; Dlx1; Dlx4; Dlx6; Dmbx1; Emx1; En2; Esx1; Gsx1; Gsx2; Hesx1; Hoxa6; Hoxa7; Hoxb6; Hoxb7; Hoxc6; Isx; Lbx1; Lbx2; Lhx4; Lhx6; Lmx1a; Lmx1b; Mixl1; Msx1; Msx2; Nkx1-1; Nkx1-2; Noto; Otp; Prop1; Tlx2; Vsx2; Zbtb49 (inferredBy_MotifSimilarit…	14	338	Baiap2l2;Cyp26a1;Egr3;Eomes;Fezf2;Lbx1;Neurod1;Neurod2;Onecut1;Pkp3;Rnf39;Slc6a5;Tac2;Tbr1
65	exercise	cisbp__M0584	3.19	0.0517			22	796	Blk;Cytl1;Fezf2;Fgf5;Foxg1;H60b;Htr3a;Itpka;Krt9;Lhx6;Neurod2;Nfe2;Nr4a3;Ntn5;Oit3;Rnf39;Satb2;Slc17a7;Spag16;Tac2;Tnfaip8l3;Wnt10a
66	exercise	cisbp__M5197	3.19	0.0517	Nkx1-1; Nkx1-2 (inferredBy_Orthology).	Alx1; Alx4; Arx; Gsx2; Hoxa1; Hoxa3; Hoxa4; Hoxa5; Hoxa6; Hoxa7; Hoxb4; Hoxc4; Hoxc5; Hoxc6; Hoxd3; Lhx2; Lhx4; Lhx9; Msx3; Nobox; Otp; Prrx2; Shox2; Uncx; Vax1; Vax2 (inferredBy_MotifSimilarity). Alx3; Bsx; Dlx1; Dlx4; Dlx6; Emx1; Emx2; En1; En2; Esx1; Evx1; Evx2; Gbx1; Gbx2; Gsx1; Hoxb1; Hoxb3; Hoxb5; Hoxb6; Hoxb7; Hoxd1; Hoxd4; Isl1; Isl2; Isx; Lbx2; Lhx1; Lhx3; Lhx5; Lhx6; Lhx8; Lmx1a; Lmx1b;…	17	572	Baiap2l2;Cyp26a1;Egr3;Eomes;Fezf2;Fst;Kcng1;Lbx1;Neurod1;Neurod2;Nr4a3;Onecut1;Pkp3;Rnf39;Slc6a5;Tac2;Tbr1
67	exercise	cisbp__M5046	3.19	0.0517	En1; En2 (inferredBy_Orthology).	Alx1; Alx4; Arx; Lbx2; Lhx4; Lhx9; Prrx2; Shox2; Uncx (inferredBy_MotifSimilarity). Dlx1; Dlx4; Dlx6; Gbx1; Gbx2; Hoxa6; Hoxa7; Hoxb6; Hoxb7; Hoxc6; Isx; Lhx2; Lmx1b; Mnx1; Nkx1-1; Nkx1-2; Nkx6-2; Prop1; Prrx1; Vsx2 (inferredBy_MotifSimilarity_n_Orthology).	13	301	Baiap2l2;Cyp26a1;Egr3;Eomes;Fezf2;Lbx1;Neurod1;Neurod2;Onecut1;Pkp3;Slc6a5;Tac2;Tbr1
68	exercise	cisbp__M5503	3.19	0.0517	Gsx2 (inferredBy_Orthology).	Alx1; Arx; Hoxc5; Lbx2; Lhx2; Lhx9; Prrx2; Shox2; Vsx1 (inferredBy_MotifSimilarity). Alx3; Dbx1; Dbx2; Dlx1; Dlx4; Dlx6; Emx1; Emx2; En1; En2; Gbx1; Gbx2; Gsx1; Hoxa1; Hoxa6; Hoxa7; Hoxb1; Hoxb3; Hoxb6; Hoxb7; Hoxc6; Hoxd1; Isx; Lhx6; Lhx8; Nkx1-1; Nkx1-2; Nkx6-1; Nkx6-2; Nkx6-3; Prop1; Prrx1; Tlx1; Tlx2; Tlx3; Uncx; Vsx2 (inferredBy_MotifSimilarity_n_Orthology).	10	155	Cyp26a1;Egr3;Fezf2;Lbx1;Neurod2;Nr4a3;Onecut1;Pkp3;Tac2;Tbr1
69	exercise	transfac_pro__M01353	3.19	0.0516	Lhx5 (directAnnotation).	Alx1; Hoxb4; Hoxc5; Lhx1; Lhx3; Lhx4; Lmx1a; Lmx1b; Pou1f1; Pou3f1; Pou3f2; Pou3f4; Vsx1 (inferredBy_MotifSimilarity). Prop1 (inferredBy_MotifSimilarity_n_Orthology).	14	381	Atoh7;Ccr9;Chat;Fezf2;Foxg1;Lbx1;Neurod2;Onecut1;Prdm8;Rab44;Slc18a3;Slc6a5;Tbr1;Xirp2
70	exercise	taipale__PRRX2_full_NYAATTAN	3.18	0.0516	Prrx2 (inferredBy_Orthology).	Alx1; Alx3; Alx4; Arx; Barhl1; En1; Gbx1; Gbx2; Lhx2; Lhx9; Msx3; Nobox; Rax; Shox2; Uncx; Vsx1 (inferredBy_MotifSimilarity). Bsx; Dmbx1; Emx1; Emx2; En2; Esx1; Gsx1; Gsx2; Hesx1; Hoxa6; Hoxa7; Hoxb6; Hoxb7; Hoxc6; Isx; Lbx1; Lbx2; Lhx3; Lhx4; Mixl1; Msx1; Msx2; Nkx1-1; Nkx1-2; Otp; Prop1; Prrx1; Tlx2; Vsx2 (inferredBy_MotifSimilarity_n_Orthology).	16	561	Baiap2l2;Cyp26a1;Egr3;Eomes;Fezf2;Lbx1;Lhx6;Neurod1;Neurod2;Nr4a3;Onecut1;Pkp3;Rnf39;Slc6a5;Tac2;Tbr1
71	exercise	taipale_cyt_meth__LHX4_NTAATTAN_FL_meth	3.18	0.0516	Lhx4 (inferredBy_Orthology).	Alx1; Alx3; Alx4; Arx; Barx2; En1; En2; Esx1; Gbx1; Gsx2; Hoxa1; Hoxa3; Hoxc5; Hoxd1; Lbx2; Lhx1; Lhx2; Lhx3; Lhx6; Lhx8; Lhx9; Msx1; Nkx1-2; Nobox; Noto; Pax4; Pax6; Pax7; Phox2a; Pou1f1; Pou3f2; Prrx1; Prrx2; Rax; Rhox6; Sebox; Shox2; Uncx; Vax1; Vax2; Vsx1 (inferredBy_MotifSimilarity). Emx1; Emx2; Gbx2; Gsx1; Hesx1; Isx; Lbx1; Lhx5; Lmx1a; Lmx1b; Mixl1; Mnx1; Otp; Pou6f1; Prop1; Prrxl1; Tlx2; …	9	149	Egr3;Fezf2;Lbx1;Neurod1;Neurod2;Onecut1;Pkp3;Slc6a5;Tbr1
72	exercise	flyfactorsurvey__Dll_SOLEXA_FBgn0000157	3.18	0.0516	Dlx1; Dlx4; Dlx6 (inferredBy_Orthology).	Alx1; Alx4; Arx; Dlx2; Dlx3; Emx2; Evx1; Gsx2; Hoxa1; Hoxd1; Hoxd3; Lhx2; Lhx5; Lhx9; Nkx6-1; Prop1; Prrx2; Rax; Shox2; Uncx; Vax1; Vax2; Vsx1 (inferredBy_MotifSimilarity). Alx3; Bsx; Dlx5; Emx1; En1; En2; Esx1; Gbx1; Gbx2; Gm28308; Hoxa2; Hoxa4; Hoxa5; Hoxa6; Hoxa7; Hoxb2; Hoxb3; Hoxb4; Hoxb5; Hoxb6; Hoxb7; Hoxc4; Hoxc6; Hoxd4; Isx; Lbx1; Lbx2; Lhx6; Lhx8; Lmx1b; Meox1; Meox2; Mixl1; Mnx1; Msx1;…	17	494	Baiap2l2;Cyp26a1;Egr3;Eomes;Fezf2;Fst;Kcng1;Lbx1;Neurod1;Neurod2;Nr4a3;Onecut1;Pkp3;Rnf39;Slc6a5;Tac2;Tbr1
73	exercise	dbcorrdb__STAT2__ENCSR000FAT_1__m2	3.18	0.0515	Stat2 (inferredBy_Orthology).		18	565	Ccr9;Cyp26a1;Egr3;Eomes;Fgf5;Kcnip2;Kcnj4;Lbx1;Ltbp2;Mall;Nphs1;Ntn5;Prdm8;Serinc2;Tac2;Tcp11;Tnfaip8l3;Vdr
74	exercise	cisbp__M1036	3.18	0.0515	Msx1 (directAnnotation).	Alx1; Arx; Gbx2; Isx; Msx3; Nkx1-2; Phox2a; Rax; Shox2; Uncx; Vax1; Vax2 (inferredBy_MotifSimilarity). En1; En2; Gbx1; Hesx1; Hoxa6; Hoxa7; Hoxb6; Hoxb7; Hoxc6; Lbx1; Lbx2; Lhx9; Mixl1; Msx2; Prrx2; Tlx2; Zbtb49 (inferredBy_MotifSimilarity_n_Orthology).	16	445	Baiap2l2;Cyp26a1;Egr3;Eomes;Fezf2;Foxg1;Fst;Lbx1;Lhx6;Neurod1;Neurod2;Nr4a3;Onecut1;Pkp3;Slc6a5;Tbr1
75	exercise	cisbp__M0910	3.18	0.0515	Dlx3 (directAnnotation).	Bsx; Dlx1; Dlx2; Dlx4; Dlx5; Hoxd1; Meox1; Msx2; Nobox (inferredBy_MotifSimilarity).	13	335	Baiap2l2;Cyp26a1;Egr3;Fezf2;Fst;Lbx1;Neurod1;Neurod2;Nr4a3;Onecut1;Pkp3;Tac2;Tbr1
76	exercise	cisbp__M6110	3.17	0.0515	Vsx1 (directAnnotation).	Alx1; Alx3; Alx4; Arx; En1; Gbx1; Lhx2; Lhx3; Msx3; Nobox; Pax6; Prrx2; Rax; Shox2; Uncx (inferredBy_MotifSimilarity). Bsx; Dlx1; Dlx4; Dlx6; Dmbx1; En2; Esx1; Gbx2; Gsx1; Gsx2; Hoxd3; Isx; Lbx1; Lbx2; Lhx4; Lhx8; Lhx9; Lmx1b; Mixl1; Msx1; Msx2; Prrx1; Tlx2; Vsx2 (inferredBy_MotifSimilarity_n_Orthology).	13	288	Baiap2l2;Cyp26a1;Egr3;Fezf2;Lbx1;Neurod1;Neurod2;Onecut1;Pkp3;Rnf39;Slc6a5;Tac2;Tbr1
77	exercise	cisbp__M1153	3.17	0.0515		Emx2; Evx1; Gbx2; Gsx2; Hoxa1; Hoxa2; Hoxa3; Hoxa5; Hoxd1; Hoxd3; Lhx6; Vax1; Vax2 (inferredBy_MotifSimilarity). Emx1; Hoxb2; Lhx2; Lhx4; Lhx8; Nobox (inferredBy_MotifSimilarity_n_Orthology).	19	704	Atoh7;Baiap2l2;Bnc2;Chrm1;Cyp26a1;Egr3;Fezf2;Foxg1;Fst;Htr3a;Lbx1;Neurod1;Neurod2;Nr4a3;Onecut1;Pkp3;Slc6a5;Tac2;Tbr1
78	exercise	transfac_pro__M07815	3.17	0.0515	Otp (inferredBy_Orthology).	Alx1; Alx3; Alx4; Arx; Esx1; Hoxb4; Hoxc5; Lbx2; Lhx1; Lhx3; Lhx4; Lhx6; Lhx9; Lmx1a; Lmx1b; Noto; Pax6; Pax7; Phox2b; Pou1f1; Pou3f1; Prop1; Prrx2; Rhox6; Sebox; Shox2; Uncx; Vsx1 (inferredBy_MotifSimilarity). Emx1; Emx2; En1; En2; Gbx1; Gbx2; Hoxa1; Hoxb1; Hoxd1; Isx; Lhx2; Lhx5; Lhx8; Mixl1; Nkx1-1; Nkx1-2; Pou6f1; Prrx1; Prrxl1; Rax; Tlx2; Traf4; Vsx2; Zfhx2 (inferredBy_MotifSimilarity_n_Orth…	19	712	Atoh7;Baiap2l2;Chat;Cyp26a1;Egr3;Eomes;Fezf2;Kcng1;Lbx1;Neurod1;Neurod2;Onecut1;Pkp3;Prdm8;Rab44;Rnf39;Slc18a3;Slc6a5;Tbr1
79	exercise	cisbp__M1024	3.17	0.0515	Dlx1 (directAnnotation).	Bsx; Dlx2; Dlx3; Dlx4; Dlx5; Hoxd1; Meox1; Msx2; Nobox; Vax1; Vax2 (inferredBy_MotifSimilarity).	14	403	Baiap2l2;Cyp26a1;Egr3;Fezf2;Foxg1;Fst;Lbx1;Lhx6;Neurod1;Neurod2;Nr4a3;Onecut1;Pkp3;Tbr1
80	exercise	taipale__BSX_DBD_NYNATTAN	3.17	0.0515	Bsx (inferredBy_Orthology).	Gbx1; Gbx2; Msx3; Shox2; Vsx1 (inferredBy_MotifSimilarity). Alx3; Esx1; Hoxa5; Hoxa6; Hoxa7; Hoxb5; Hoxb6; Hoxb7; Hoxc5; Hoxc6; Isx; Lhx4; Lhx9; Msx1; Msx2; Prrx1; Prrx2 (inferredBy_MotifSimilarity_n_Orthology).	16	534	Baiap2l2;Cyp26a1;Egr3;Fezf2;Fst;Kcng1;Lbx1;Neurod1;Neurod2;Nr4a3;Onecut1;Pkp3;Rnf39;Slc6a5;Tac2;Tbr1
81	exercise	taipale_cyt_meth__ALX3_CYAATTAN_FL_meth	3.17	0.0515	Alx3 (inferredBy_Orthology).	Barx2; En1; Prrx2; Vsx1 (inferredBy_MotifSimilarity). Alx4; Arx; Dlx1; Dlx4; Dlx6; Esx1; Lhx3; Lhx4; Lhx6; Lhx8; Lmx1b; Nkx1-1; Nkx1-2; Phox2a; Vax1; Vax2 (inferredBy_MotifSimilarity_n_Orthology).	14	343	Baiap2l2;Cyp26a1;Egr3;Eomes;Fezf2;Lbx1;Neurod1;Neurod2;Onecut1;Pkp3;Rnf39;Slc6a5;Tac2;Tbr1
82	exercise	transfac_pro__M07848	3.16	0.0514	Lhx1; Lhx5 (inferredBy_Orthology).	Dlx5 (inferredBy_MotifSimilarity). Bsx; Dlx1; Dlx3; Dlx4; Dlx6; En1; Gbx1; Gbx2; Hoxa1; Hoxa5; Hoxa7; Hoxb2; Hoxb5; Hoxb7; Hoxd1; Hoxd4; Lhx4; Meox1; Meox2; Msx1; Phox2b; Prrx2; Vax1 (inferredBy_MotifSimilarity_n_Orthology).	15	447	Baiap2l2;Cyp26a1;Egr3;Fezf2;Lbx1;Lhx6;Neurod1;Neurod2;Nr4a3;Onecut1;Pkp3;Rnf39;Slc6a5;Tac2;Tbr1
83	exercise	flyfactorsurvey__inv_SOLEXA_5_FBgn0001269	3.16	0.0514	En1; En2 (inferredBy_Orthology).	Alx1; Alx4; Arx; Lbx2; Lhx4; Lhx9; Prrx2; Shox2; Uncx (inferredBy_MotifSimilarity). Dlx1; Dlx4; Dlx6; Gbx1; Gbx2; Hoxa6; Hoxa7; Hoxb6; Hoxb7; Hoxc6; Isx; Lhx2; Lmx1b; Mnx1; Nkx1-1; Nkx1-2; Nkx6-2; Prop1; Prrx1; Vsx2 (inferredBy_MotifSimilarity_n_Orthology).	13	294	Baiap2l2;Cyp26a1;Egr3;Eomes;Fezf2;Lbx1;Neurod1;Neurod2;Onecut1;Pkp3;Slc6a5;Tac2;Tbr1
84	exercise	jaspar__MA0630.1	3.16	0.0514		Alx1; Alx3; Alx4; Arx; Barhl1; Emx2; En1; En2; Gbx1; Gbx2; Lbx2; Lhx2; Lhx3; Lhx4; Lhx9; Msx1; Msx3; Nkx1-2; Nobox; Noto; Pax6; Pax7; Phox2a; Pou1f1; Prop1; Prrx1; Prrx2; Rax; Sebox; Shox2; Uncx; Vax2; Vsx1 (inferredBy_MotifSimilarity). Bsx; Dlx1; Dlx4; Dlx6; Dmbx1; Emx1; Esx1; Gsx1; Gsx2; Hesx1; Hoxa6; Hoxa7; Hoxb6; Hoxb7; Hoxc6; Isx; Lbx1; Lhx1; Lhx5; Lhx6; Lhx8; Lmx1a; Lmx1b; Mixl1; Msx2; Nkx1…	14	334	Baiap2l2;Cyp26a1;Egr3;Eomes;Fezf2;Lbx1;Neurod1;Neurod2;Onecut1;Pkp3;Rnf39;Slc6a5;Tac2;Tbr1
85	exercise	cisbp__M5807	3.16	0.0514	Shox2 (inferredBy_Orthology).	Alx1; Alx3; Alx4; Arx; Barhl1; Emx2; En1; En2; Gbx1; Gbx2; Lbx2; Lhx2; Lhx8; Lhx9; Msx1; Msx3; Nkx1-2; Nobox; Phox2a; Prrx1; Prrx2; Rax; Uncx; Vax2; Vsx1 (inferredBy_MotifSimilarity). Dlx1; Dlx4; Dlx6; Emx1; Esx1; Gsx1; Gsx2; Hesx1; Hoxa6; Hoxa7; Hoxb6; Hoxb7; Hoxc6; Isx; Lbx1; Lhx3; Lhx4; Lhx6; Lmx1a; Lmx1b; Mixl1; Msx2; Nkx1-1; Noto; Otp; Prop1; Tlx2; Traf4; Vsx2; Zbtb49; Zfhx2 (inferredBy_Moti…	14	328	Baiap2l2;Cyp26a1;Egr3;Eomes;Fezf2;Lbx1;Neurod1;Neurod2;Onecut1;Pkp3;Rnf39;Slc6a5;Tac2;Tbr1
86	exercise	cisbp__M5806	3.16	0.0514		Alx1; Alx3; Alx4; Arx; Barhl1; Emx2; En1; En2; Gbx1; Gbx2; Gsx2; Lbx2; Lhx2; Lhx3; Lhx4; Lhx8; Lhx9; Msx1; Msx3; Nkx1-2; Nobox; Noto; Pax6; Pax7; Phox2a; Pou1f1; Prop1; Prrx1; Prrx2; Rax; Sebox; Shox2; Uncx; Vax2; Vsx1 (inferredBy_MotifSimilarity). Bsx; Dlx1; Dlx4; Dlx6; Dmbx1; Emx1; Esx1; Gsx1; Hesx1; Hoxa1; Hoxa6; Hoxa7; Hoxb6; Hoxb7; Hoxc6; Isx; Lbx1; Lhx1; Lhx5; Lhx6; Lmx1a; Lmx1b; Mixl1; Msx…	13	270	Baiap2l2;Cyp26a1;Egr3;Eomes;Fezf2;Lbx1;Neurod1;Neurod2;Onecut1;Pkp3;Rnf39;Slc6a5;Tbr1
87	exercise	cisbp__M1144	3.16	0.0514		Alx1; Bsx; Emx2; En1; En2; Evx1; Gsx2; Hoxa1; Hoxa3; Hoxa5; Hoxd1; Hoxd3; Lhx9; Msx2; Nkx6-1; Nobox; Vax1; Vax2 (inferredBy_MotifSimilarity). Emx1; Gbx1; Hoxa6; Hoxa7; Hoxb1; Hoxb5; Hoxb6; Hoxb7; Hoxc6; Lhx5; Nkx1-1; Nkx1-2; Nkx6-2; Shox2 (inferredBy_MotifSimilarity_n_Orthology).	12	326	Baiap2l2;Cyp26a1;Egr3;Fezf2;Lbx1;Neurod1;Neurod2;Nr4a3;Onecut1;Pkp3;Slc6a5;Tbr1
88	exercise	cisbp__M0900	3.15	0.0513		Alx1; Alx3; Alx4; Arx; Barhl1; Emx2; En1; En2; Esx1; Gbx1; Gbx2; Lbx2; Lhx2; Lhx3; Lhx4; Lhx9; Msx1; Msx3; Nkx1-2; Nobox; Noto; Pax6; Pax7; Phox2a; Pou1f1; Prop1; Prrx1; Prrx2; Rax; Sebox; Shox2; Uncx; Vax2; Vsx1 (inferredBy_MotifSimilarity). Bsx; Dlx1; Dlx4; Dlx6; Dmbx1; Emx1; Gsx1; Gsx2; Hesx1; Hoxa6; Hoxa7; Hoxb6; Hoxb7; Hoxc6; Isx; Lbx1; Lhx1; Lhx5; Lhx6; Lhx8; Lmx1a; Lmx1b; Mixl1; Msx2; Nkx1…	14	349	Baiap2l2;Cyp26a1;Egr3;Eomes;Fezf2;Lbx1;Neurod1;Neurod2;Onecut1;Pkp3;Rnf39;Slc6a5;Tac2;Tbr1
89	exercise	cisbp__M5310	3.15	0.0513	Bsx (inferredBy_Orthology).	Gbx1; Gbx2; Msx3; Vsx1 (inferredBy_MotifSimilarity). Alx3; Alx4; En1; Esx1; Hoxa5; Hoxa6; Hoxa7; Hoxb5; Hoxb6; Hoxb7; Hoxc5; Hoxc6; Isx; Lbx1; Lhx4; Lhx9; Msx1; Msx2; Prrx1; Prrx2 (inferredBy_MotifSimilarity_n_Orthology).	16	525	Baiap2l2;Cyp26a1;Egr3;Fezf2;Fst;Kcng1;Lbx1;Neurod1;Neurod2;Nr4a3;Onecut1;Pkp3;Rnf39;Slc6a5;Tac2;Tbr1
90	exercise	flyfactorsurvey__Slou_SOLEXA_FBgn0002941	3.15	0.0513	Nkx1-1; Nkx1-2 (inferredBy_Orthology).	Alx1; Alx4; Arx; Gsx2; Hoxa1; Hoxa3; Hoxa4; Hoxa5; Hoxa6; Hoxa7; Hoxb4; Hoxc4; Hoxc5; Hoxc6; Hoxd3; Lhx2; Lhx4; Lhx9; Msx3; Nobox; Prrx2; Shox2; Uncx; Vax1; Vax2 (inferredBy_MotifSimilarity). Alx3; Bsx; Dlx1; Dlx4; Dlx6; Emx1; Emx2; En1; En2; Esx1; Evx1; Evx2; Gbx1; Gbx2; Gsx1; Hesx1; Hoxb1; Hoxb3; Hoxb5; Hoxb6; Hoxb7; Hoxd1; Hoxd4; Isl1; Isl2; Isx; Lbx2; Lhx1; Lhx3; Lhx5; Lhx6; Lhx8; Lmx1a; Lmx1…	17	542	Baiap2l2;Cyp26a1;Egr3;Eomes;Fezf2;Fst;Kcng1;Lbx1;Neurod1;Neurod2;Nr4a3;Onecut1;Pkp3;Rnf39;Slc6a5;Tac2;Tbr1
91	exercise	cisbp__M4917	3.15	0.0513	Dlx1; Dlx4; Dlx6 (inferredBy_Orthology).	Alx1; Alx4; Arx; Dlx2; Emx2; Evx1; Gsx2; Hoxa1; Hoxd1; Hoxd3; Lhx1; Lhx2; Lhx5; Lhx9; Prrx2; Shox2; Uncx; Vax1; Vax2; Vsx1 (inferredBy_MotifSimilarity). Bsx; Dlx3; Dlx5; Emx1; En1; En2; Gbx1; Gbx2; Hoxa4; Hoxa5; Hoxa6; Hoxa7; Hoxb2; Hoxb4; Hoxb5; Hoxb6; Hoxb7; Hoxc4; Hoxc6; Hoxd4; Isx; Lbx1; Lbx2; Lhx6; Lhx8; Lmx1b; Meox1; Mnx1; Msx1; Msx2; Msx3; Nkx1-1; Nkx1-2; Nkx6-1; Nkx6-2; Noto; Otp; Pdx1; P…	17	501	Baiap2l2;Cyp26a1;Egr3;Eomes;Fezf2;Fst;Kcng1;Lbx1;Neurod1;Neurod2;Nr4a3;Onecut1;Pkp3;Rnf39;Slc6a5;Tac2;Tbr1
92	exercise	taipale_cyt_meth__LHX1_NYAATTAN_eDBD	3.15	0.0512	Lhx1 (inferredBy_Orthology).	Dlx5 (inferredBy_MotifSimilarity). Bsx; Dlx1; Dlx3; Dlx4; Dlx6; En1; Gbx1; Gbx2; Hoxa1; Hoxa5; Hoxb2; Hoxb5; Hoxd1; Hoxd4; Lhx5; Meox1; Meox2; Mnx1; Msx1; Phox2b; Prrx2; Vax1 (inferredBy_MotifSimilarity_n_Orthology).	15	527	Baiap2l2;Cyp26a1;Egr3;Fezf2;Lbx1;Lhx6;Neurod1;Neurod2;Nr4a3;Onecut1;Pkp3;Rnf39;Slc6a5;Tac2;Tbr1
93	exercise	taipale_cyt_meth__DRGX_YYAATTAN_eDBD_meth	3.15	0.0512	Prrxl1 (inferredBy_Orthology).	Alx3; Hoxd3; Lhx4; Prop1; Prrx2 (inferredBy_MotifSimilarity). Emx1; Emx2; Esx1; Gsx2; Mnx1; Pdx1; Rax; Vsx1; Vsx2 (inferredBy_MotifSimilarity_n_Orthology).	14	393	Baiap2l2;Cyp26a1;Egr3;Eomes;Fezf2;Lbx1;Neurod1;Neurod2;Onecut1;Pkp3;Rnf39;Slc6a5;Tac2;Tbr1
94	exercise	cisbp__M0882	3.15	0.0512		Alx1; Alx4; Arx; Barhl1; Hoxa1; Hoxd1; Lbx2; Lhx2; Lhx9; Msx1; Msx3; Nobox; Pax6; Pax7; Pou3f2; Prrx2; Sebox; Shox2; Uncx; Vsx1 (inferredBy_MotifSimilarity). Alx3; Emx1; Emx2; En1; En2; Gbx1; Gbx2; Hoxb5; Isx; Lbx1; Lhx1; Lhx3; Lhx4; Lhx5; Lhx6; Lhx8; Nkx1-1; Nkx1-2; Otp; Pou6f1; Prop1; Prrx1; Prrxl1; Vsx2; Zfhx2 (inferredBy_MotifSimilarity_n_Orthology).	19	758	Atoh7;Baiap2l2;Chat;Cyp26a1;Eomes;Fezf2;Krt20;Lbx1;Neurod1;Neurod2;Neurod6;Onecut1;Pkp3;Rab44;Rnf39;Slc14a2;Slc18a3;Slc6a5;Tbr1
95	exercise	cisbp__M0975	3.14	0.0512	Lhx5 (directAnnotation).	Alx3; Lhx1; Lhx3; Prop1 (inferredBy_MotifSimilarity). Dlx1; Dlx4; Dlx6; En1; En2 (inferredBy_MotifSimilarity_n_Orthology).	14	395	Baiap2l2;Cyp26a1;Egr3;Fezf2;Fst;Lbx1;Neurod1;Neurod2;Nr4a3;Onecut1;Pkp3;Slc6a5;Tac2;Tbr1
96	exercise	taipale__SHOX2_DBD_NYAATTAN	3.14	0.0512	Shox2 (inferredBy_Orthology).	Alx1; Alx3; Alx4; Arx; Barhl1; Emx2; En1; En2; Gbx1; Gbx2; Lbx2; Lhx2; Lhx3; Lhx4; Lhx8; Lhx9; Msx1; Msx3; Nkx1-2; Nobox; Phox2a; Prrx1; Prrx2; Rax; Uncx; Vax2; Vsx1 (inferredBy_MotifSimilarity). Dlx1; Dlx4; Dlx6; Emx1; Esx1; Gsx1; Gsx2; Hesx1; Hoxa6; Hoxa7; Hoxb6; Hoxb7; Hoxc6; Isx; Lbx1; Lhx6; Lmx1a; Lmx1b; Mixl1; Mnx1; Msx2; Nkx1-1; Noto; Otp; Prop1; Tlx2; Traf4; Vsx2; Zbtb49; Zfhx2 (inferredB…	14	371	Baiap2l2;Cyp26a1;Egr3;Eomes;Fezf2;Lbx1;Neurod1;Neurod2;Onecut1;Pkp3;Rnf39;Slc6a5;Tac2;Tbr1
97	exercise	taipale_cyt_meth__TBX1_NNAGGTGTGANN_eDBD_meth	3.14	0.0512	Tbx1 (inferredBy_Orthology).	Eomes; Tbr1 (inferredBy_MotifSimilarity). Tbx10; Tbx15; Tbx21; Tbx3; Tbx6 (inferredBy_MotifSimilarity_n_Orthology).	37	2012	9130024F11Rik;Actg2;B230208H11Rik;Blk;Bnc2;Cd5;Chrm1;Egr2;Egr4;Fezf2;Foxg1;H60b;Kcng1;Kcng3;Kcnh3;Kcnip2;Kcnj4;Kcnmb1;Krt9;Loxl2;Mall;Mas1;Mesp2;Mfi2;Neurod1;Neurod2;Neurod6;Nr4a3;Onecut1;Pkp3;Rgs14;Rtn4rl2;Satb2;Tac2;Tcp11;Vgll3;Wnt10a
98	exercise	taipale_cyt_meth__HESX1_CTAATTAN_FL_meth	3.14	0.0511	Hesx1 (inferredBy_Orthology).		20	842	3110039M20Rik;Baiap2l2;Cyp26a1;Egr3;Eomes;Fezf2;Foxg1;Fst;Lbx1;Lhx6;Neurod1;Neurod2;Onecut1;Pkp3;Prdm8;Rnf39;Slc6a5;Tac2;Tbr1;Xirp2
99	exercise	cisbp__M0116	3.14	0.0511			36	2146	Atoh7;Baiap2l2;Bnc2;Bves;Chat;Chrm1;Cyp26a1;Egr3;Eomes;Fezf2;Foxg1;Fst;H60b;Icam5;Kcng1;Kcnip2;Kcnj4;Lbx1;Lhx6;Loxl2;Mesp2;Mir129-1;Neurod1;Neurod2;Nr4a3;Onecut1;Pkp3;Prdm8;Rab44;Slc18a3;Slc6a5;Tac2;Tbr1;Tnfaip8l3;Wnt10a;Zscan10
100	exercise	transfac_pro__M07824	3.14	0.0511		Emx2; En1; Gbx2; Rax; Shox2 (inferredBy_MotifSimilarity). Barhl1; Bsx; Emx1; En2; Gbx1; Hoxb2; Lbx1; Lhx4; Mnx1; Msx1; Msx2; Msx3; Noto; Phox2b; Prrx1; Prrx2; Tlx2; Uncx; Vax1; Vax2; Vsx2 (inferredBy_MotifSimilarity_n_Orthology).	13	307	Cyp26a1;Egr3;Eomes;Fezf2;Lbx1;Lhx6;Neurod1;Neurod2;Pkp3;Rnf39;Slc6a5;Tac2;Tbr1
101	exercise	taipale__Vsx1_DBD_NYAATTAN	3.13	0.0511	Vsx1 (directAnnotation).	Alx1; Alx3; Alx4; Arx; En1; Gbx1; Lhx2; Msx3; Nobox; Prrx2; Rax; Shox2; Uncx (inferredBy_MotifSimilarity). Bsx; Dlx1; Dlx4; Dlx6; Dmbx1; En2; Esx1; Gbx2; Gsx1; Gsx2; Hoxa6; Hoxa7; Hoxb6; Hoxb7; Hoxc6; Isx; Lbx1; Lbx2; Lhx3; Lhx4; Lhx8; Lhx9; Lmx1b; Mixl1; Msx1; Msx2; Prop1; Prrx1; Tlx2; Vsx2 (inferredBy_MotifSimilarity_n_Orthology).	14	346	Baiap2l2;Cyp26a1;Egr3;Eomes;Fezf2;Lbx1;Neurod1;Neurod2;Onecut1;Pkp3;Rnf39;Slc6a5;Tac2;Tbr1
102	exercise	transfac_pro__M03546	3.13	0.0511	Dlx5 (directAnnotation).		17	544	Bhlha9;Chrm1;Cyp26a1;Egr3;Fezf2;Foxg1;Fst;H60b;Lbx1;Lhx6;Neurod1;Neurod2;Nphs1;Nr4a3;Onecut1;Pkp3;Slc6a5
103	exercise	cisbp__M0950	3.13	0.0511	Dlx2 (directAnnotation).	Bsx; Dlx1; Dlx3; Dlx4; Dlx5; Hoxa5; Hoxd1; Msx2; Nobox; Vax1; Vax2 (inferredBy_MotifSimilarity).	15	457	Baiap2l2;Cyp26a1;Egr3;Fezf2;Foxg1;Fst;Lbx1;Lhx6;Neurod1;Neurod2;Nr4a3;Onecut1;Pkp3;Tac2;Tbr1
104	exercise	taipale_cyt_meth__PHOX2B_NYAATTAN_eDBD	3.13	0.0511	Phox2b (inferredBy_Orthology).	Dlx5; Gbx2 (inferredBy_MotifSimilarity). Barhl1; Barhl2; Bsx; Dlx1; Dlx3; Dlx6; Emx1; En1; En2; Esx1; Evx2; Gbx1; Gm28308; Hoxa1; Hoxa2; Hoxa5; Hoxb1; Hoxb2; Hoxb5; Hoxd1; Hoxd4; Lhx1; Lhx4; Lhx5; Lhx6; Meox1; Meox2; Mnx1; Msx1; Msx2; Nkx1-1; Nkx1-2; Prrx2; Vax1; Vax2; Vsx2 (inferredBy_MotifSimilarity_n_Orthology).	14	385	Cyp26a1;Egr3;Eomes;Fezf2;Lbx1;Lhx6;Neurod1;Neurod2;Onecut1;Pkp3;Rnf39;Slc6a5;Tac2;Tbr1
105	exercise	cisbp__M1119	3.13	0.0511		Barx2; Hoxa2; Hoxa3; Hoxd1; Hoxd3; Pdx1 (inferredBy_MotifSimilarity). En1; En2; Hoxa1; Lhx4; Lhx6; Lhx8; Mnx1; Vax1 (inferredBy_MotifSimilarity_n_Orthology).	15	459	Baiap2l2;Cyp26a1;Egr3;Eomes;Fezf2;Foxg1;Fst;Lbx1;Neurod1;Neurod2;Nr4a3;Onecut1;Pkp3;Slc6a5;Tac2
106	exercise	cisbp__M4853	3.13	0.051		Alx1; Alx3; Alx4; Arx; Gbx1; Lbx2; Lhx2; Lhx4; Lhx9; Nobox; Pax6; Pou1f1; Prop1; Prrx2; Shox2; Uncx; Vsx1 (inferredBy_MotifSimilarity). Dlx1; Dlx4; Dlx6; Emx1; Emx2; En1; En2; Esx1; Gbx2; Gsx2; Hesx1; Hoxa1; Hoxa6; Hoxa7; Hoxb6; Hoxb7; Hoxc6; Isl1; Isl2; Isx; Lbx1; Lhx1; Lhx3; Lhx5; Lhx6; Lhx8; Lmx1a; Lmx1b; Mixl1; Nkx1-1; Nkx1-2; Noto; Otp; Prrx1; Prrxl1; Rax; Tlx2; Vsx2 (inferredBy_MotifSimilar…	15	443	Baiap2l2;Cyp26a1;Egr3;Eomes;Fezf2;Kcng1;Lbx1;Neurod1;Neurod2;Onecut1;Pkp3;Rnf39;Slc6a5;Tac2;Tbr1
107	exercise	cisbp__M0967	3.13	0.051	Shox2 (directAnnotation).	Alx1; Alx3; Alx4; Arx; Barhl1; Emx2; En1; Gbx1; Gbx2; Lbx2; Lhx2; Lhx4; Lhx9; Msx1; Msx3; Nkx1-2; Nobox; Noto; Prop1; Prrx2; Rax; Uncx; Vax2; Vsx1 (inferredBy_MotifSimilarity). Dmbx1; Emx1; En2; Esx1; Gsx1; Gsx2; Hesx1; Hoxa6; Hoxa7; Hoxb6; Hoxb7; Hoxc6; Isl1; Isl2; Isx; Lbx1; Lhx1; Lhx3; Lhx5; Lhx6; Lhx8; Lmx1a; Lmx1b; Mixl1; Msx2; Nkx1-1; Otp; Prrx1; Tlx2; Traf4; Vsx2; Zbtb49; Zfhx2 (inferredBy…	19	711	Baiap2l2;Cyp26a1;Egr3;Eomes;Fezf2;Foxg1;Fst;Kcng1;Lbx1;Lhx6;Neurod1;Neurod2;Nr4a3;Onecut1;Pkp3;Rnf39;Slc6a5;Tac2;Tbr1
108	exercise	taipale__DLX2_DBD_NYAATTAN	3.12	0.051	Dlx2 (inferredBy_Orthology).	Dlx1; Dlx3; Dlx4; Dlx5 (inferredBy_MotifSimilarity). Dlx6; Msx1; Msx2; Msx3; Prrx1 (inferredBy_MotifSimilarity_n_Orthology).	14	345	Baiap2l2;Cyp26a1;Egr3;Fezf2;Lbx1;Lhx6;Neurod1;Neurod2;Nr4a3;Onecut1;Pkp3;Rnf39;Tac2;Tbr1
109	exercise	cisbp__M5340	3.11	0.0509	Dlx2 (inferredBy_Orthology).	Dlx1; Dlx3; Dlx4; Dlx5 (inferredBy_MotifSimilarity). Dlx6; Msx1; Msx2; Msx3; Prrx1 (inferredBy_MotifSimilarity_n_Orthology).	14	368	Baiap2l2;Cyp26a1;Egr3;Fezf2;Lbx1;Lhx6;Neurod1;Neurod2;Nr4a3;Onecut1;Pkp3;Rnf39;Tac2;Tbr1
110	exercise	taipale_cyt_meth__TBX2_NAGGTGTGAN_eDBD_meth	3.11	0.0509	Tbx2 (inferredBy_Orthology).	Tbr1; Tbx20; Tbx3; Tbx4; Tbx5 (inferredBy_MotifSimilarity). Eomes; T; Tbx1; Tbx15; Tbx18; Tbx19; Tbx21; Tbx6 (inferredBy_MotifSimilarity_n_Orthology).	11	202	9130024F11Rik;Chrm1;F7;H60b;Loxl2;Mesp2;Mfi2;Neurod2;Nr4a3;Rtn4rl2;Satb2
111	exercise	flyfactorsurvey__Unpg_Cell_FBgn0015561	3.11	0.0508	Gbx1; Gbx2 (inferredBy_Orthology).	Hoxc5 (inferredBy_MotifSimilarity). Dlx1; Dlx4; Dlx6; Emx1; Emx2; En1; En2; Hoxa1; Hoxb1; Hoxd1; Lhx1; Lhx2; Lhx3; Lhx4; Lhx5; Lhx6; Lhx8; Lhx9; Nkx1-1; Nkx1-2; Otp; Prop1; Prrx2; Prrxl1; Vsx2 (inferredBy_MotifSimilarity_n_Orthology).	13	272	Baiap2l2;Cyp26a1;Egr3;Eomes;Fezf2;Lbx1;Neurod1;Neurod2;Onecut1;Pkp3;Rnf39;Slc6a5;Tbr1
112	exercise	taipale__SHOX_DBD_NYAATTAN	3.11	0.0508		Alx1; Alx3; Alx4; Arx; Barhl1; Emx2; En1; En2; Gbx1; Gbx2; Gsx2; Lbx2; Lhx2; Lhx3; Lhx4; Lhx8; Lhx9; Msx1; Msx3; Nkx1-2; Nobox; Noto; Pax6; Pax7; Phox2a; Pou1f1; Prop1; Prrx1; Prrx2; Rax; Sebox; Shox2; Uncx; Vax2; Vsx1 (inferredBy_MotifSimilarity). Bsx; Dlx1; Dlx4; Dlx6; Dmbx1; Emx1; Esx1; Gsx1; Hesx1; Hoxa1; Hoxa6; Hoxa7; Hoxb6; Hoxb7; Hoxc6; Isx; Lbx1; Lhx1; Lhx5; Lhx6; Lmx1a; Lmx1b; Mixl1; Msx…	13	320	Baiap2l2;Cyp26a1;Egr3;Eomes;Fezf2;Lbx1;Neurod1;Neurod2;Onecut1;Pkp3;Rnf39;Slc6a5;Tbr1
113	exercise	flyfactorsurvey__CG33980_SOLEXA_2_10_FBgn0053980	3.1	0.0508	Vsx2 (inferredBy_Orthology).	Alx1; Alx3; Alx4; Arx; Gbx1; Lbx2; Lhx2; Lhx4; Lhx9; Nobox; Pax6; Pou1f1; Prop1; Prrx2; Rhox6; Shox2; Uncx; Vsx1 (inferredBy_MotifSimilarity). Dlx1; Dlx4; Dlx6; Emx1; Emx2; En1; En2; Esx1; Gbx2; Gsx2; Hesx1; Hoxa1; Hoxa6; Hoxa7; Hoxb1; Hoxb6; Hoxb7; Hoxc6; Hoxd1; Isl1; Isl2; Isx; Lbx1; Lhx1; Lhx3; Lhx5; Lhx6; Lhx8; Lmx1a; Lmx1b; Mixl1; Nkx1-1; Nkx1-2; Noto; Otp; Prrx1; Prrxl1; Rax; Tlx2; Traf4 (i…	15	451	Baiap2l2;Cyp26a1;Egr3;Eomes;Fezf2;Kcng1;Lbx1;Neurod1;Neurod2;Onecut1;Pkp3;Rnf39;Slc6a5;Tac2;Tbr1
114	exercise	transfac_pro__M01458	3.1	0.0508	Uncx (directAnnotation).	Alx1; Alx4; Hoxa4; Hoxa7; Hoxb4; Hoxc5; Lhx3; Lhx4; Lhx9; Nobox; Noto; Otp; Phox2b; Shox2; Vsx1 (inferredBy_MotifSimilarity). Arx; Lhx1; Lhx5; Lhx6; Lhx8; Lmx1a; Prrxl1; Zfhx2 (inferredBy_MotifSimilarity_n_Orthology).	10	164	Atoh7;Baiap2l2;Chat;Lbx1;Neurod2;Onecut1;Rab44;Slc18a3;Slc6a5;Tbr1
115	exercise	cisbp__M0954	3.1	0.0507	Rax (directAnnotation).	Alx1; Alx3; Alx4; Arx; Emx2; En1; En2; Esx1; Gbx1; Gbx2; Hoxd1; Hoxd3; Isx; Lbx2; Lhx2; Lhx4; Lhx6; Lhx8; Lhx9; Msx1; Msx2; Msx3; Nkx1-1; Nkx1-2; Nobox; Noto; Otp; Pax4; Phox2a; Phox2b; Prrx1; Prrx2; Shox2; Uncx; Vsx1 (inferredBy_MotifSimilarity). Dlx1; Dlx4; Dlx6; Emx1; Hesx1; Lbx1; Lhx1; Lhx5; Mixl1; Mnx1; Pou6f2; Tlx2; Vsx2; Zbtb49; Zfhx2; Zfhx3 (inferredBy_MotifSimilarity_n_Orthology).	18	659	Baiap2l2;Cyp26a1;Egr3;Eomes;Fezf2;Foxg1;Fst;Kcng1;Lbx1;Neurod1;Neurod2;Nr4a3;Onecut1;Pkp3;Rnf39;Slc6a5;Tac2;Tbr1
116	exercise	cisbp__M5160	3.1	0.0507			9	144	Baiap2l2;Cyp26a1;Eomes;Lbx1;Neurod1;Neurod2;Pkp3;Slc6a5;Tbr1
117	exercise	hocomoco__LHX4_HUMAN.H11MO.0.D	3.09	0.0507	Lhx4 (inferredBy_Orthology).	Alx1; Alx3; Alx4; Arx; Esx1; Hoxd1; Lhx2; Lhx3; Lmx1b; Msx1; Msx3; Noto; Otp; Pax6; Pou2f1; Pou3f1; Pou3f2; Prop1; Prrx1; Prrx2; Rax; Sebox; Shox2; Uncx; Vsx1; Vsx2 (inferredBy_MotifSimilarity). Emx1; Emx2; En1; En2; Gbx1; Gbx2; Hoxa1; Hoxb1; Isx; Lbx1; Lbx2; Lhx1; Lhx5; Lhx6; Lhx8; Lhx9; Lmx1a; Nkx1-1; Nkx1-2; Prrxl1; Tlx2; Zfhx2 (inferredBy_MotifSimilarity_n_Orthology).	29	1482	Atoh7;Baiap2l2;Chat;Cyp26a1;Egr3;Eomes;Fezf2;Foxg1;Fst;Kcng1;Kcnip2;Krt20;Lbx1;Mall;Mfi2;Neurod1;Neurod2;Nr4a3;Onecut1;Pkp3;Prdm8;Rab44;Rnf39;Rtn4rl2;Slc18a3;Slc6a5;Tac2;Tbr1;Uts2
118	exercise	cisbp__M5341	3.09	0.0506	Dlx3 (inferredBy_Orthology).	Dlx1; Dlx2; Dlx4; Dlx5 (inferredBy_MotifSimilarity). Dlx6; Msx1; Msx2; Msx3 (inferredBy_MotifSimilarity_n_Orthology).	15	417	Baiap2l2;Cyp26a1;Egr3;Fezf2;Lbx1;Lhx6;Neurod1;Neurod2;Nr4a3;Onecut1;Pkp3;Rnf39;Slc6a5;Tac2;Tbr1
119	exercise	cisbp__M0896	3.09	0.0506		Hoxa1; Lhx2; Lhx9 (inferredBy_MotifSimilarity). Alx3; Arx; Dmbx1; Gbx1; Gbx2; Gsx1; Gsx2; Hoxb1; Hoxb5; Hoxd1; Isx; Lbx2; Nkx6-1; Nkx6-2; Nkx6-3; Pou4f1; Prrx1; Uncx (inferredBy_MotifSimilarity_n_Orthology).	13	343	Atoh7;Baiap2l2;Egr3;Fezf2;Lbx1;Lox;Neurod1;Neurod2;Onecut1;Pkp3;Slc6a5;Tac2;Tbr1
120	exercise	flyfactorsurvey__Pph13_Cell_FBgn0023489	3.09	0.0506			9	155	Baiap2l2;Cyp26a1;Eomes;Lbx1;Neurod1;Neurod2;Pkp3;Slc6a5;Tbr1
121	exercise	cisbp__M0890	3.09	0.0506	Lhx6 (inferredBy_Orthology).		13	325	Bnc2;Chrm1;Egr3;Fezf2;Fst;Lbx1;Lhx6;Neurod2;Nr4a3;Onecut1;Pkp3;Slc6a5;Tbr1
122	exercise	cisbp__M1193	3.08	0.0506		Alx1; Alx3; Alx4; Arx; Barhl1; Emx2; En1; Gbx1; Gbx2; Lbx2; Lhx2; Lhx9; Msx1; Msx3; Nobox; Prrx2; Rax; Shox2; Uncx; Vax2; Vsx1 (inferredBy_MotifSimilarity). Dmbx1; Emx1; En2; Esx1; Gsx1; Gsx2; Hesx1; Hoxa6; Hoxa7; Hoxb6; Hoxb7; Hoxc6; Isx; Lbx1; Lhx3; Lhx4; Lmx1a; Lmx1b; Mixl1; Msx2; Nkx1-1; Nkx1-2; Otp; Prop1; Prrx1; Tlx2; Traf4; Vsx2; Zbtb49 (inferredBy_MotifSimilarity_n_Orthology).	18	624	Baiap2l2;Cyp26a1;Egr3;Eomes;Fezf2;Foxg1;Fst;Lbx1;Lhx6;Neurod1;Neurod2;Nr4a3;Onecut1;Pkp3;Rnf39;Slc6a5;Tac2;Tbr1
123	exercise	cisbp__M5949	3.08	0.0506	Vsx1 (inferredBy_Orthology).	Alx3 (inferredBy_MotifSimilarity). Emx1; Emx2; Gbx1; Gbx2; Gsx1; Gsx2; Hoxd4; Lhx2; Lhx3; Lhx4; Lhx6; Lhx8; Lhx9; Noto; Otp; Pdx1; Uncx (inferredBy_MotifSimilarity_n_Orthology).	14	403	Baiap2l2;Cyp26a1;Egr3;Eomes;Fezf2;Lbx1;Neurod1;Neurod2;Onecut1;Pkp3;Rnf39;Slc6a5;Tac2;Tbr1
124	exercise	hocomoco__ZBT49_HUMAN.H11MO.0.D	3.08	0.0506	Zbtb49 (inferredBy_Orthology).	Alx1; Alx4; Arx; En1; Gbx1; Gbx2; Isx; Lhx6; Msx1; Msx2; Nkx1-2; Nobox; Phox2a; Phox2b; Prrx2; Rax; Shox2; Uncx; Vsx1 (inferredBy_MotifSimilarity). Emx1; En2; Hesx1; Lbx1; Lbx2; Lhx4; Lhx8; Lhx9; Mnx1; Noto; Prrx1; Tlx2 (inferredBy_MotifSimilarity_n_Orthology).	12	248	Baiap2l2;Cyp26a1;Egr3;Eomes;Fezf2;Lbx1;Neurod1;Neurod2;Onecut1;Pkp3;Rnf39;Slc6a5
125	exercise	taipale_cyt_meth__PRRX2_CYAATTAN_FL_meth	3.08	0.0506	Prrx2 (inferredBy_Orthology).	Alx1; Alx3; Alx4; Arx; En1; Gbx1; Lbx2; Lhx2; Lhx9; Nobox; Noto; Pax6; Shox2; Uncx; Vsx1 (inferredBy_MotifSimilarity). Dmbx1; Emx1; Emx2; En2; Esx1; Gbx2; Gsx1; Gsx2; Hoxa1; Hoxb1; Hoxb5; Hoxd1; Isx; Lbx1; Lhx1; Lhx3; Lhx4; Lhx5; Lhx6; Lhx8; Lmx1a; Lmx1b; Mixl1; Nkx1-1; Nkx1-2; Otp; Prop1; Prrx1; Prrxl1; Rax; Vsx2; Zfhx2 (inferredBy_MotifSimilarity_n_Orthology).	11	234	Baiap2l2;Eomes;Fezf2;Lbx1;Neurod1;Neurod2;Onecut1;Pkp3;Rnf39;Slc6a5;Tbr1
126	exercise	taipale__Prrx2_DBD_NYAATTAN	3.08	0.0506	Prrx2 (directAnnotation).	Alx1; Alx3; Alx4; Arx; Emx2; En1; En2; Esx1; Gbx1; Gsx2; Lbx2; Lhx2; Lhx3; Lhx4; Lhx6; Lhx8; Lhx9; Msx1; Nkx1-2; Nobox; Noto; Pax4; Pax6; Pax7; Phox2a; Pou1f1; Pou3f2; Prop1; Prrx1; Rax; Sebox; Shox2; Uncx; Vax2; Vsx1; Vsx2 (inferredBy_MotifSimilarity). Dlx1; Dlx4; Dlx6; Dmbx1; Emx1; Gbx2; Gsx1; Hesx1; Isx; Lbx1; Lhx1; Lhx5; Lmx1a; Lmx1b; Mixl1; Nkx1-1; Otp; Pou6f1; Prrxl1; Tlx2; Traf4; Zbtb49; Z…	12	264	Baiap2l2;Cyp26a1;Eomes;Fezf2;Lbx1;Neurod1;Neurod2;Onecut1;Pkp3;Rnf39;Slc6a5;Tbr1
127	exercise	flyfactorsurvey__Exex_SOLEXA_FBgn0041156	3.08	0.0505	Mnx1 (inferredBy_Orthology).	Evx1; Hoxa1; Hoxd1; Hoxd3; Lhx9; Vax1; Vax2 (inferredBy_MotifSimilarity). Dlx1; Dlx4; Dlx6; Emx1; En1; En2; Esx1; Gbx1; Gbx2; Hoxa4; Hoxa5; Hoxa6; Hoxa7; Hoxb2; Hoxb4; Hoxb5; Hoxb6; Hoxb7; Hoxc4; Hoxc6; Hoxd4; Lbx2; Lmx1b; Meox1; Meox2; Nkx1-1; Nkx1-2; Noto; Pdx1; Prop1; Prrxl1; Uncx (inferredBy_MotifSimilarity_n_Orthology).	16	442	Baiap2l2;Cyp26a1;Egr3;Eomes;Fezf2;Fst;Kcng1;Lbx1;Neurod1;Neurod2;Onecut1;Pkp3;Rnf39;Slc6a5;Tac2;Tbr1
128	exercise	jaspar__MA0245.1	3.08	0.0505	Nkx1-1; Nkx1-2 (inferredBy_Orthology).	Alx1; Alx4; Arx; Hoxa1; Hoxa4; Hoxa5; Hoxa6; Hoxa7; Hoxb5; Hoxc5; Hoxc8; Isl2; Lhx2; Lhx9; Msx3; Nobox; Shox2; Uncx; Vax1; Vax2 (inferredBy_MotifSimilarity). Bsx; Dlx1; Dlx4; Dlx6; Dmbx1; Emx1; Emx2; En1; En2; Gbx1; Gbx2; Gsx2; Hoxb1; Hoxb4; Hoxb6; Hoxb7; Hoxc4; Hoxc6; Hoxd1; Hoxd4; Isl1; Lbx2; Lhx1; Lhx5; Lhx6; Lhx8; Mixl1; Mnx1; Nkx6-2; Otp; Prop1; Prrx1; Prrx2; Prrxl1; Rax; Traf4; Vsx2 (inferr…	16	469	Baiap2l2;Cyp26a1;Egr3;Eomes;Fezf2;Fst;Kcng1;Lbx1;Neurod1;Neurod2;Nr4a3;Onecut1;Pkp3;Slc6a5;Tac2;Tbr1
129	exercise	cisbp__M6065	3.07	0.0505	Prrx2 (directAnnotation).	Alx1; Alx3; Alx4; Arx; Emx2; En1; En2; Esx1; Gbx1; Gsx2; Lbx2; Lhx2; Lhx3; Lhx4; Lhx6; Lhx8; Lhx9; Msx1; Nkx1-2; Nobox; Noto; Pax4; Pax6; Pax7; Phox2a; Pou1f1; Pou3f2; Prop1; Prrx1; Rax; Sebox; Shox2; Uncx; Vax2; Vsx1; Vsx2 (inferredBy_MotifSimilarity). Dlx1; Dlx4; Dlx6; Dmbx1; Emx1; Gbx2; Gsx1; Hesx1; Hoxa6; Hoxa7; Hoxb6; Hoxb7; Hoxc6; Isx; Lbx1; Lhx1; Lhx5; Lmx1a; Lmx1b; Mixl1; Nkx1-1; Otp; Pou…	12	272	Baiap2l2;Cyp26a1;Eomes;Fezf2;Lbx1;Neurod1;Neurod2;Onecut1;Pkp3;Rnf39;Slc6a5;Tbr1
130	exercise	taipale_tf_pairs__HOXA7_NYMATTAN_HT	3.07	0.0505	Hoxa7 (inferredBy_Orthology).		9	161	Cyp26a1;Egr3;Fezf2;Fst;Lbx1;Neurod2;Onecut1;Pkp3;Tac2
131	exercise	taipale_cyt_meth__ESX1_YYAATTAN_eDBD	3.07	0.0505	Esx1 (inferredBy_Orthology).	En1; Prrx2 (inferredBy_MotifSimilarity). Bsx; Lhx4; Nkx1-1; Nkx1-2; Phox2b; Prrxl1; Rax; Vsx1; Vsx2 (inferredBy_MotifSimilarity_n_Orthology).	17	601	3110039M20Rik;Baiap2l2;Bnc2;Cyp26a1;Egr3;Eomes;Fezf2;Lbx1;Lhx6;Neurod1;Neurod2;Onecut1;Pkp3;Rnf39;Slc6a5;Tac2;Tbr1
132	exercise	flyfactorsurvey__Dfd_FlyReg_FBgn0000439	3.07	0.0505	Hoxa4; Hoxb4; Hoxc4; Hoxd4 (inferredBy_Orthology).	Hoxc5 (inferredBy_MotifSimilarity). Bsx; Dlx1; Dlx4; Dlx6; Emx1; Emx2; En1; En2; Gbx1; Gbx2; Hoxa1; Hoxa6; Hoxa7; Hoxb1; Hoxb6; Hoxb7; Hoxc6; Hoxd1; Lhx2; Lhx9; Mnx1; Nkx1-1; Nkx1-2; Nkx6-1; Nkx6-2; Nkx6-3; Pdx1; Prop1; Uncx (inferredBy_MotifSimilarity_n_Orthology).	12	233	Baiap2l2;Cyp26a1;Egr3;Fezf2;Fst;Lbx1;Lhx6;Neurod2;Nr4a3;Onecut1;Pkp3;Tac2
133	exercise	cisbp__M4945	3.07	0.0505	En1; En2 (inferredBy_Orthology).	Alx1; Alx4; Arx; Lbx2; Lhx4; Lhx9; Prrx2; Shox2; Uncx (inferredBy_MotifSimilarity). Emx1; Emx2; Gbx1; Gbx2; Hoxa1; Hoxa6; Hoxa7; Hoxb1; Hoxb6; Hoxb7; Hoxc6; Hoxd1; Isx; Lhx1; Lhx2; Lhx3; Lhx5; Lhx6; Lhx8; Lmx1a; Lmx1b; Nkx1-1; Nkx1-2; Otp; Prop1; Prrx1; Prrxl1; Vsx2 (inferredBy_MotifSimilarity_n_Orthology).	12	290	Baiap2l2;Cyp26a1;Egr3;Fezf2;Lbx1;Neurod1;Neurod2;Onecut1;Pkp3;Slc6a5;Tac2;Tbr1
134	exercise	taipale_cyt_meth__ALX3_CYAATTAN_FL	3.06	0.0504	Alx3 (inferredBy_Orthology).	Alx1; Arx; Barx2; En1; Gbx1; Gsx2; Hoxa1; Hoxa2; Hoxa3; Lhx2; Lhx3; Lhx8; Pax6; Prrx2; Shox2; Uncx; Vax2; Vsx1 (inferredBy_MotifSimilarity). Alx4; Bsx; Emx1; En2; Esx1; Gbx2; Gsx1; Hoxd3; Isx; Lbx1; Lbx2; Lhx4; Lhx6; Lhx9; Lmx1b; Mixl1; Msx1; Msx2; Noto; Phox2a; Prrx1; Tlx2; Vax1 (inferredBy_MotifSimilarity_n_Orthology).	12	264	Baiap2l2;Cyp26a1;Eomes;Fezf2;Lbx1;Neurod1;Neurod2;Onecut1;Pkp3;Rnf39;Slc6a5;Tbr1
135	exercise	cisbp__M5343	3.06	0.0503	Dlx5 (inferredBy_Orthology).	Dlx1; Dlx2; Dlx3; Dlx4 (inferredBy_MotifSimilarity). Dlx6 (inferredBy_MotifSimilarity_n_Orthology).	15	434	Baiap2l2;Cyp26a1;Egr3;Fezf2;Fst;Lbx1;Neurod1;Neurod2;Nr4a3;Onecut1;Pkp3;Rnf39;Slc6a5;Tac2;Tbr1
136	exercise	cisbp__M5754	3.06	0.0503	Prrx1 (inferredBy_Orthology).	Alx1; Alx3; Alx4; Arx; En1; Gbx1; Lbx2; Lhx2; Lhx3; Lhx4; Lhx9; Msx1; Msx3; Nobox; Noto; Pax6; Phox2a; Prop1; Prrx2; Rax; Sebox; Shox2; Uncx; Vax2; Vsx1 (inferredBy_MotifSimilarity). Dlx1; Dlx4; Dlx6; Dmbx1; Emx1; Emx2; En2; Esx1; Gbx2; Gsx1; Gsx2; Hesx1; Hoxa6; Hoxa7; Hoxb6; Hoxb7; Hoxc6; Isx; Lbx1; Lhx1; Lhx5; Lhx6; Lhx8; Lmx1a; Lmx1b; Mixl1; Mnx1; Nkx1-1; Nkx1-2; Otp; Prrxl1; Tlx2; Traf4; Vsx2…	11	204	Baiap2l2;Cyp26a1;Egr3;Fezf2;Lbx1;Neurod1;Neurod2;Onecut1;Pkp3;Slc6a5;Tbr1
137	exercise	cisbp__M6082	3.06	0.0503	Shox2 (directAnnotation).	Alx1; Alx3; Alx4; Arx; Barhl1; Emx2; En1; En2; Gbx1; Gbx2; Lbx2; Lhx2; Lhx3; Lhx4; Lhx8; Lhx9; Msx1; Msx3; Nkx1-2; Nobox; Noto; Phox2a; Prrx1; Prrx2; Rax; Uncx; Vax2; Vsx1 (inferredBy_MotifSimilarity). Bsx; Dlx1; Dlx4; Dlx6; Emx1; Esx1; Gsx1; Gsx2; Hesx1; Hoxa1; Hoxa6; Hoxa7; Hoxb6; Hoxb7; Hoxc6; Isx; Lbx1; Lhx6; Lmx1a; Lmx1b; Mixl1; Msx2; Nkx1-1; Otp; Pax4; Pou6f1; Prop1; Tlx2; Traf4; Vsx2; Zbtb…	14	394	Baiap2l2;Cyp26a1;Egr3;Eomes;Fezf2;Lbx1;Neurod1;Neurod2;Onecut1;Pkp3;Rnf39;Slc6a5;Tac2;Tbr1
138	exercise	cisbp__M3853	3.06	0.0503	Prrx2 (directAnnotation).	Alx1; Alx3; Alx4; Arx; En2; Gbx1; Noto; Otp; Rax; Shox2; Uncx; Vsx1 (inferredBy_MotifSimilarity). Emx2; En1; Esx1; Gbx2; Isx; Lbx2; Lhx6; Lhx8; Lhx9; Nkx1-1; Nkx1-2; Prop1; Prrx1; Tlx2; Zfhx2 (inferredBy_MotifSimilarity_n_Orthology).	16	384	Baiap2l2;Chat;Egr3;Eomes;Fezf2;Foxg1;Lbx1;Neurod1;Neurod2;Neurod6;Onecut1;Pkp3;Rnf39;Slc18a3;Slc6a5;Tbr1
139	exercise	flyfactorsurvey__en_SOLEXA_2_FBgn0000577	3.05	0.0503	En1; En2 (inferredBy_Orthology).	Alx1; Alx4; Arx; Lhx4; Lhx9; Prrx2; Shox2; Uncx (inferredBy_MotifSimilarity). Emx1; Emx2; Gbx1; Gbx2; Hoxa1; Hoxb1; Hoxd1; Isx; Lhx1; Lhx2; Lhx3; Lhx5; Lhx6; Lhx8; Lmx1a; Lmx1b; Nkx1-1; Nkx1-2; Otp; Prop1; Prrx1; Prrxl1; Tlx2; Vsx2 (inferredBy_MotifSimilarity_n_Orthology).	12	305	Baiap2l2;Cyp26a1;Egr3;Fezf2;Lbx1;Neurod1;Neurod2;Onecut1;Pkp3;Slc6a5;Tac2;Tbr1
140	exercise	taipale_cyt_meth__TLX2_NCAATTAN_eDBD_meth	3.05	0.0503	Tlx2 (inferredBy_Orthology).	Alx1; Alx4; Arx; Gbx1; Lhx3; Msx1; Prrx2; Rax; Shox2; Uncx (inferredBy_MotifSimilarity). En1; En2; Esx1; Foxo1; Gbx2; Hesx1; Isx; Lbx1; Lbx2; Lhx4; Lhx6; Lhx8; Lhx9; Mixl1; Noto; Pax3; Prrx1; Vax1; Vsx2; Zbtb49 (inferredBy_MotifSimilarity_n_Orthology).	10	157	Baiap2l2;Cyp26a1;Eomes;Lbx1;Neurod1;Neurod2;Pkp3;Rnf39;Slc6a5;Tbr1
141	exercise	taipale__PRRX1_DBD_NYAATTAN	3.05	0.0502	Prrx1 (inferredBy_Orthology).	Alx1; Alx3; Alx4; Arx; En1; Gbx1; Lbx2; Lhx2; Lhx4; Lhx9; Msx1; Msx3; Nobox; Noto; Pax6; Phox2a; Prop1; Prrx2; Rax; Sebox; Shox2; Uncx; Vax2; Vsx1 (inferredBy_MotifSimilarity). Bsx; Dlx1; Dlx4; Dlx6; Dmbx1; Emx1; Emx2; En2; Esx1; Gbx2; Gsx1; Gsx2; Hesx1; Hoxa6; Hoxa7; Hoxb6; Hoxb7; Hoxc6; Isx; Lbx1; Lhx1; Lhx3; Lhx5; Lhx6; Lhx8; Lmx1a; Lmx1b; Mixl1; Mnx1; Nkx1-1; Nkx1-2; Otp; Prrxl1; Tlx2; Traf4;…	12	247	Baiap2l2;Cyp26a1;Egr3;Fezf2;Lbx1;Neurod1;Neurod2;Onecut1;Pkp3;Rnf39;Slc6a5;Tbr1
142	exercise	transfac_pro__M07901	3.04	0.0502	Tbx1; Tbx10 (inferredBy_Orthology).	Eomes; T; Tbr1; Tbx15; Tbx18; Tbx2; Tbx20; Tbx22; Tbx3; Tbx4; Tbx5; Tbx6 (inferredBy_MotifSimilarity). Mga; Tbx19; Tbx21 (inferredBy_MotifSimilarity_n_Orthology).	39	2459	9130024F11Rik;Actg2;Bcl2a1d;Bnc2;Cd5;Chrm1;F7;Fst;H60b;Itpka;Kcng3;Kcnh3;Kcnip2;Kcnj4;Lox;Loxl2;Ltbp2;Mesp2;Mfi2;Neurod1;Neurod2;Nfe2;Nkg7;Nr4a3;Oit3;Ptk2b;Rgs14;Rnf39;Rtn4rl2;Satb2;Serinc2;Slc17a7;Slc6a5;Tcp11;Tdrd1;Vdr;Vpreb3;Wnt10a;Zfp831
143	exercise	cisbp__M0911	3.04	0.0502	Mnx1 (directAnnotation).	Barx2; Dlx5; Emx2; Evx1; Gbx2; Gsx2; Hoxa1; Hoxa2; Hoxa3; Hoxa5; Hoxb3; Hoxd1; Hoxd3; Msx2; Nobox; Pdx1; Vax1; Vax2 (inferredBy_MotifSimilarity). Emx1; En1; En2; Evx2; Gbx1; Hoxa6; Hoxa7; Hoxb6; Hoxb7; Hoxc6; Shox2 (inferredBy_MotifSimilarity_n_Orthology).	15	485	Baiap2l2;Cyp26a1;Egr3;Fezf2;Foxg1;Fst;Lbx1;Lhx6;Neurod1;Neurod2;Nr4a3;Onecut1;Pkp3;Tac2;Tbr1
144	exercise	taipale_cyt_meth__ARX_CYAATTAN_eDBD	3.04	0.0502	Arx (inferredBy_Orthology).	Alx1; Alx3; Gbx1; Gsx2; Hoxa1; Lhx3; Lhx4; Lhx9; Noto; Pax6; Prrx2; Shox2; Uncx; Vax2; Vsx1 (inferredBy_MotifSimilarity). Dmbx1; Emx1; Emx2; En1; En2; Esx1; Gbx2; Gsx1; Hoxd3; Isx; Lbx1; Lbx2; Lhx2; Lhx6; Lhx8; Lmx1b; Mixl1; Otp; Prop1; Prrx1; Rax; Tlx2; Vsx2; Zfhx2 (inferredBy_MotifSimilarity_n_Orthology).	9	156	Fezf2;Lbx1;Neurod1;Neurod2;Onecut1;Pkp3;Rnf39;Slc6a5;Tbr1
145	exercise	taipale__Shox2_DBD_NYAATTAN	3.04	0.0501	Shox2 (directAnnotation).	Alx1; Alx3; Alx4; Arx; Barhl1; Emx2; En1; En2; Gbx1; Gbx2; Lbx2; Lhx2; Lhx3; Lhx4; Lhx8; Lhx9; Msx1; Msx3; Nkx1-2; Nobox; Noto; Pax6; Phox2a; Pou1f1; Prrx1; Prrx2; Rax; Uncx; Vax2; Vsx1; Vsx2 (inferredBy_MotifSimilarity). Bsx; Dlx1; Dlx4; Dlx6; Dmbx1; Emx1; Esx1; Gsx1; Gsx2; Hesx1; Hoxa1; Hoxa6; Hoxa7; Hoxb6; Hoxb7; Hoxc6; Isx; Lbx1; Lhx6; Lmx1a; Lmx1b; Mixl1; Mnx1; Msx2; Nkx1-1; Otp; Pax4; Pou6f…	14	388	Baiap2l2;Cyp26a1;Egr3;Eomes;Fezf2;Lbx1;Neurod1;Neurod2;Onecut1;Pkp3;Rnf39;Slc6a5;Tac2;Tbr1
146	exercise	yetfasco__YNR063W_804	3.04	0.0501			11	240	Chrm1;Emx1;Eomes;Foxg1;Fst;Kcnh3;Neurod1;Neurod2;Onecut1;Pla2g5;Slc6a5
147	exercise	flyfactorsurvey__H2.0_Cell_FBgn0001170	3.04	0.0501	Hlx (inferredBy_Orthology).		14	406	Chrm1;Cyp26a1;Egr3;Fezf2;Foxg1;Lbx1;Mesp2;Neurod1;Neurod2;Nr4a3;Onecut1;Pkp3;Slc6a5;Tbr1
148	exercise	taipale__DLX3_DBD_NYAATTAN	3.04	0.0501	Dlx3 (inferredBy_Orthology).	Dlx1; Dlx4; Dlx5 (inferredBy_MotifSimilarity). Dlx2; Dlx6; Msx1; Prrx1 (inferredBy_MotifSimilarity_n_Orthology).	15	434	Baiap2l2;Cyp26a1;Egr3;Fezf2;Lbx1;Lhx6;Neurod1;Neurod2;Nr4a3;Onecut1;Pkp3;Rnf39;Slc6a5;Tac2;Tbr1
149	exercise	transfac_pro__M04915	3.03	0.0501	Tbp (inferredBy_Orthology).		31	1694	3110039M20Rik;Actg2;Agtr1a;Ankk1;Atoh7;Atp6v1c2;Bnc2;Egr2;Egr3;Elf3;Eomes;Fezf2;Fgf5;Foxg1;Kcnmb1;Krt9;Lbx1;Lhx6;Nek10;Neurod1;Neurod2;Neurod6;Npy;Pla2g5;Rtn4rl2;Slc14a2;Slc6a5;Spag16;Vgll3;Wnt10a;Zfp831
150	exercise	cisbp__M1626	3.03	0.0501	Tbx2 (directAnnotation).	Eomes; Tbr1; Tbx15; Tbx20; Tbx3; Tbx4; Tbx5 (inferredBy_MotifSimilarity). T; Tbx1; Tbx10; Tbx18; Tbx19; Tbx21; Tbx6 (inferredBy_MotifSimilarity_n_Orthology).	18	719	9130024F11Rik;Actg2;Chrm1;F7;Fezf2;Fst;H60b;Kcnh3;Lox;Mesp2;Mfi2;Neurod2;Nkg7;Nr4a3;Rnf39;Rtn4rl2;Satb2;Wnt10a
151	exercise	cisbp__M0962	3.03	0.05	Lhx6 (directAnnotation).	Hoxa1; Vax1; Vax2 (inferredBy_MotifSimilarity). En1; En2; Hoxa6; Hoxa7; Hoxb6; Hoxb7; Hoxc6; Lhx4 (inferredBy_MotifSimilarity_n_Orthology).	10	167	Egr3;Fezf2;Lbx1;Lhx6;Neurod1;Neurod2;Onecut1;Pkp3;Slc6a5;Tbr1
152	exercise	taipale__VSX1_DBD_YTAATTAN	3.02	0.05	Vsx1 (inferredBy_Orthology).	Alx3; Evx1 (inferredBy_MotifSimilarity). Emx1; Emx2; Gbx1; Gbx2; Gsx1; Gsx2; Hoxd4; Lhx2; Lhx3; Lhx4; Lhx6; Lhx8; Lhx9; Noto; Otp; Pdx1; Uncx (inferredBy_MotifSimilarity_n_Orthology).	14	400	Baiap2l2;Cyp26a1;Egr3;Eomes;Fezf2;Lbx1;Neurod1;Neurod2;Onecut1;Pkp3;Rnf39;Slc6a5;Tac2;Tbr1
153	exercise	idmmpmm__abd-A	3.02	0.05	Hoxa6; Hoxa7; Hoxb6; Hoxb7; Hoxc6 (inferredBy_Orthology).	Hoxa4; Hoxa5; Hoxb4; Hoxc4; Hoxc5; Hoxc8 (inferredBy_MotifSimilarity). Bsx; Emx1; Emx2; En1; En2; Gbx1; Gbx2; Hoxa1; Hoxb1; Hoxb5; Hoxd1; Lhx1; Lhx2; Lhx5; Lhx9; Lmx1a; Lmx1b; Meox1; Meox2; Nkx1-1; Nkx1-2; Nkx6-1; Nkx6-2; Nkx6-3; Prop1; Prrxl1; Uncx; Vsx2 (inferredBy_MotifSimilarity_n_Orthology).	13	411	Baiap2l2;Cyp26a1;Egr3;Fezf2;Lbx1;Lhx6;Neurod1;Neurod2;Nr4a3;Onecut1;Pkp3;Slc6a5;Tac2
154	exercise	cisbp__M0931	3.02	0.05	Lhx1 (directAnnotation).	Alx3; Lhx3; Lhx5; Lmx1b; Prop1 (inferredBy_MotifSimilarity). Dlx1; Dlx4; Dlx6 (inferredBy_MotifSimilarity_n_Orthology).	14	403	Baiap2l2;Cyp26a1;Egr3;Fezf2;Fst;Lbx1;Neurod1;Neurod2;Nr4a3;Onecut1;Pkp3;Slc6a5;Tac2;Tbr1
155	exercise	jaspar__MA0175.1	3.02	0.05		Alx1; Alx4; Arx; Barhl1; Gbx1; Hoxa5; Msx1; Msx3; Nobox; Prrx2; Shox2; Uncx; Vax1; Vax2 (inferredBy_MotifSimilarity). Emx1; Emx2; En1; En2; Esx1; Gbx2; Hesx1; Hoxa6; Hoxa7; Hoxb6; Hoxb7; Hoxc6; Isl1; Isl2; Isx; Lbx2; Lhx9; Mixl1; Msx2; Nkx1-1; Nkx1-2; Otp; Prop1; Prrx1; Rax; Vsx2 (inferredBy_MotifSimilarity_n_Orthology).	17	502	Baiap2l2;Cyp26a1;Egr3;Eomes;Fezf2;Fst;Kcng1;Lbx1;Lhx6;Neurod1;Neurod2;Onecut1;Pkp3;Rnf39;Slc6a5;Tac2;Tbr1
156	exercise	transfac_pro__M00320	3.02	0.0499			15	483	9130024F11Rik;Bnc2;Cyp26a1;Ddn;Egr3;Fezf2;Fgf5;Fst;Lbx1;Lhx6;Neurod1;Nr4a3;Prdm8;Rnf39;Satb2
157	exercise	taipale__DLX5_FL_NYAATTAN_repr	3.02	0.0499	Dlx5 (inferredBy_Orthology).	Dlx1; Dlx2; Dlx3; Dlx4 (inferredBy_MotifSimilarity). Dlx6 (inferredBy_MotifSimilarity_n_Orthology).	15	419	Baiap2l2;Cyp26a1;Egr3;Fezf2;Fst;Lbx1;Neurod1;Neurod2;Nr4a3;Onecut1;Pkp3;Rnf39;Slc6a5;Tac2;Tbr1
158	exercise	cisbp__M5261	3.01	0.0499	Gbx1; Gbx2 (inferredBy_Orthology).	Hoxc5 (inferredBy_MotifSimilarity). Dlx1; Dlx4; Dlx6; Emx1; Emx2; En1; En2; Hoxa1; Hoxb1; Hoxd1; Lhx1; Lhx2; Lhx3; Lhx4; Lhx5; Lhx6; Lhx8; Lhx9; Nkx1-1; Nkx1-2; Otp; Prop1; Prrx2; Prrxl1; Vsx2 (inferredBy_MotifSimilarity_n_Orthology).	13	265	Baiap2l2;Cyp26a1;Egr3;Eomes;Fezf2;Lbx1;Neurod1;Neurod2;Onecut1;Pkp3;Rnf39;Slc6a5;Tbr1
159	exercise	cisbp__M6108	3.01	0.0498	Uncx (directAnnotation).	Alx3; Lhx3; Lhx4; Noto; Prrx2; Vsx1 (inferredBy_MotifSimilarity). Arx; Emx1; Emx2; En1; En2; Gbx1; Gbx2; Gsx1; Gsx2; Lhx2; Lhx6; Lhx8; Lhx9; Lmx1b; Mixl1; Otp; Prop1; Prrx1; Prrxl1; Rax; Vsx2; Zfhx2 (inferredBy_MotifSimilarity_n_Orthology).	13	360	Baiap2l2;Cyp26a1;Egr3;Eomes;Fezf2;Lbx1;Neurod1;Neurod2;Onecut1;Pkp3;Rnf39;Slc6a5;Tbr1
160	exercise	taipale_cyt_meth__DRGX_YYAATTAN_eDBD	3.01	0.0498	Prrxl1 (inferredBy_Orthology).	Alx3; Emx2; Evx1; Gsx2; Hoxa1; Hoxd3; Lhx4; Prop1; Prrx2; Vax1; Vax2 (inferredBy_MotifSimilarity). Emx1; Esx1; Evx2; Hoxa6; Hoxa7; Hoxb2; Hoxb6; Hoxb7; Hoxc6; Lmx1a; Nkx1-1; Nkx1-2; Pdx1; Phox2a; Rax; Vsx1; Vsx2 (inferredBy_MotifSimilarity_n_Orthology).	13	360	Baiap2l2;Cyp26a1;Egr3;Eomes;Fezf2;Lbx1;Neurod1;Neurod2;Onecut1;Pkp3;Rnf39;Slc6a5;Tbr1
161	exercise	cisbp__M1122	3	0.0498		Alx1; Alx3; Alx4; Arx; Barhl1; Barhl2; Bsx; Emx2; En1; En2; Esx1; Gbx1; Gbx2; Hoxa1; Hoxd1; Lbx2; Lhx2; Lhx9; Msx1; Msx2; Msx3; Nkx1-2; Nkx6-1; Nkx6-2; Nobox; Noto; Phox2a; Prrx1; Prrx2; Shox2; Uncx; Vax1; Vax2; Vsx1 (inferredBy_MotifSimilarity). Gsx2; Hesx1; Hoxa6; Hoxa7; Hoxb5; Hoxb6; Hoxb7; Hoxc6; Isx; Lbx1; Lhx3; Lhx4; Lhx6; Lhx8; Nkx1-1; Otp; Pou6f1; Prop1; Prrxl1; Rax; Tlx2; Vsx2; Zfhx2 (in…	12	301	Baiap2l2;Cyp26a1;Egr3;Fezf2;Lbx1;Neurod1;Neurod2;Nr4a3;Onecut1;Pkp3;Slc6a5;Tbr1
162	exercise	taipale__Uncx_DBD_YTAATTAN	3	0.0498	Uncx (directAnnotation).	Alx3; Lhx3; Lhx4; Noto; Prrx2 (inferredBy_MotifSimilarity). Arx; Emx1; Emx2; En1; En2; Gbx1; Gbx2; Gsx1; Gsx2; Lhx2; Lhx6; Lhx8; Lhx9; Lmx1b; Mixl1; Otp; Prop1; Prrx1; Prrxl1; Rax; Vsx2; Zfhx2 (inferredBy_MotifSimilarity_n_Orthology).	13	358	Baiap2l2;Cyp26a1;Egr3;Eomes;Fezf2;Lbx1;Neurod1;Neurod2;Onecut1;Pkp3;Rnf39;Slc6a5;Tbr1
163	exercise	flyfactorsurvey__CG32532_Cell_FBgn0052532	3	0.0498	Prop1 (inferredBy_Orthology).	Alx1; Alx4; Arx; Gsx2; Hoxa1; Hoxa4; Hoxa5; Hoxa6; Hoxa7; Hoxc5; Hoxd3; Lhx2; Lhx4; Msx3; Prrx2; Shox2; Uncx; Vax1; Vax2; Vsx1 (inferredBy_MotifSimilarity). Alx3; Dlx1; Dlx4; Dlx6; Dmbx1; Emx1; Emx2; En1; En2; Esx1; Gbx1; Gbx2; Gsx1; Hoxb1; Hoxb3; Hoxb4; Hoxb5; Hoxb6; Hoxb7; Hoxc4; Hoxc6; Hoxd1; Hoxd4; Isx; Lbx2; Lhx1; Lhx3; Lhx5; Lhx6; Lhx8; Lhx9; Lmx1a; Lmx1b; Mixl1; Mnx1; Nkx1-1; Nkx1-2; Otp; …	11	213	Baiap2l2;Cyp26a1;Egr3;Fezf2;Lbx1;Neurod1;Neurod2;Onecut1;Pkp3;Slc6a5;Tbr1
164	exercise	transfac_pro__M09381	3	0.0498			17	624	Actg2;Blk;Ccno;Eomes;Foxg1;Fst;Icam5;Kcnh3;Neurod1;Onecut1;Prdm8;Rgs22;Slc6a5;Spag16;Tnfaip8l3;Vgll3;Wdr69
165	exercise	cisbp__M5502	3	0.0498	Gsx1 (inferredBy_Orthology).	Alx1; Arx; Dlx3; Hoxc5; Lbx2; Lhx2; Lhx9; Pax6; Prrx2; Shox2; Vsx1 (inferredBy_MotifSimilarity). Alx3; Emx1; Emx2; En1; En2; Esx1; Gbx1; Gbx2; Gsx2; Hoxa1; Hoxa6; Hoxa7; Hoxb1; Hoxb6; Hoxb7; Hoxc6; Hoxd1; Hoxd3; Isx; Lbx1; Lhx4; Lhx6; Lhx8; Nkx1-1; Nkx1-2; Nkx6-2; Noto; Otp; Pou4f1; Prop1; Prrx1; Uncx; Vsx2 (inferredBy_MotifSimilarity_n_Orthology).	13	344	Baiap2l2;Cyp26a1;Egr3;Fezf2;Fst;Lbx1;Neurod2;Nr4a3;Onecut1;Pkp3;Slc6a5;Tac2;Tbr1
166	exercise	jaspar__MA0220.1	3	0.0498	En1; En2 (inferredBy_Orthology).	Alx1; Alx4; Arx; Esx1; Gbx1; Gbx2; Gsx2; Hoxa1; Hoxa4; Hoxa5; Hoxc5; Hoxc6; Hoxd3; Isx; Lbx2; Lhx2; Lhx4; Lhx9; Msx1; Msx3; Noto; Otp; Phox2a; Prrx2; Rax; Shox2; Uncx; Vax1; Vax2; Vsx1 (inferredBy_MotifSimilarity). Alx3; Dlx1; Dlx4; Dlx6; Emx1; Emx2; Evx1; Evx2; Gsx1; Hesx1; Hoxa6; Hoxa7; Hoxb1; Hoxb2; Hoxb3; Hoxb4; Hoxb5; Hoxb6; Hoxb7; Hoxc4; Hoxd1; Hoxd4; Isl1; Isl2; Lbx1; Lhx1; Lhx3; Lhx5; Lhx…	13	288	Baiap2l2;Cyp26a1;Egr3;Eomes;Fezf2;Lbx1;Neurod1;Neurod2;Onecut1;Pkp3;Rnf39;Slc6a5;Tbr1
